# Supplementary material for: Pre-symptomatic transcriptome changes during cold storage of chilling sensitive and resistant peach cultivars to elucidate chilling injury mechanisms
Source: PubMed Central journal article supplement (PMC4391166; doi:10.1186/s12864-015-1395-6), 2015-03-26
Supplement: 12864_2015_1395_MOESM4_ESM.pdf [file 12864_2015_1395_MOESM4_ESM.pdf]

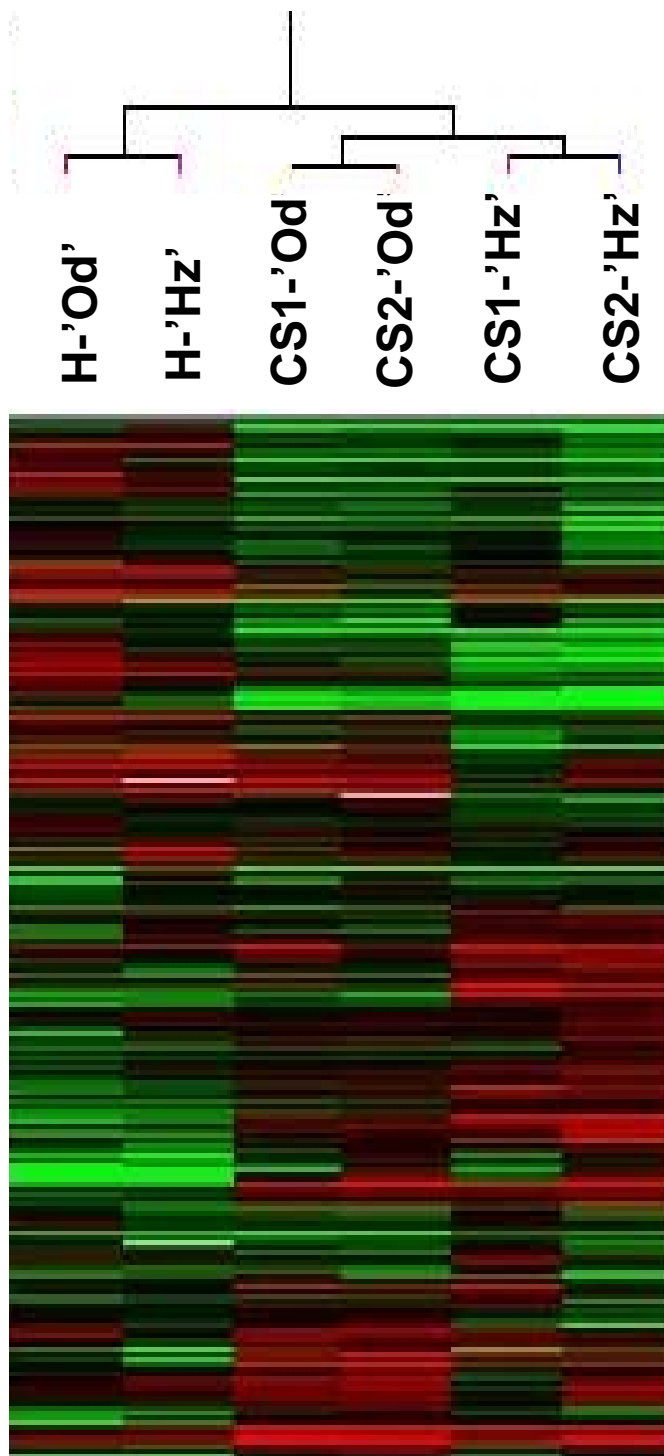

**Figure S1.** Unsupervised two-dimensional hierarchical clustering of genes differentially expressed between 'Oded' and 'Hermoza' at harvest and during cold storage. Data represent averaged lowest M log ratio for three replicates. Color represents fold change (red: up-regulated and green: down-regulated). : Harvest; CS1: cold storage of 1 week at 5°C; CS2: cold storage of 2 weeks at 5°C; 'Od': 'Oded' peach; 'Hz': 'Hermoza' peach
