# Supplementary material for: Pre-symptomatic transcriptome changes during cold storage of chilling sensitive and resistant peach cultivars to elucidate chilling injury mechanisms
Source: PubMed Central journal article supplement (PMC4391166; doi:10.1186/s12864-015-1395-6), 2015-03-26
Supplement: 12864_2015_1395_MOESM8_ESM.pdf [file 12864_2015_1395_MOESM8_ESM.pdf]

**Table S4. Complete list of refereces for table 2**

| Function<br>Specific process                                                  | id        | Unigene annotation                                                               | Arabidopsis<br>AGI | Arabidopsis thaliana proteins<br>most similar description               | Arab Gene Name                                                    | Arab Gene Symbol | Hormone signaling                                                                                                                  | Sugar<br>signaling/partioning              | Hormone and secondary<br>metabolite biosynthesis<br>regulation | Cell wall and<br>cytoesqueleton<br>related                                                                               | Cell polarity                                                         | References  |
|-------------------------------------------------------------------------------|-----------|----------------------------------------------------------------------------------|--------------------|-------------------------------------------------------------------------|-------------------------------------------------------------------|------------------|------------------------------------------------------------------------------------------------------------------------------------|--------------------------------------------|----------------------------------------------------------------|--------------------------------------------------------------------------------------------------------------------------|-----------------------------------------------------------------------|-------------|
| <b>k-means9</b>                                                               |           |                                                                                  |                    |                                                                         |                                                                   |                  |                                                                                                                                    |                                            |                                                                |                                                                                                                          |                                                                       |             |
| <b>Cytoskeleton organization and biogenesis</b>                               |           |                                                                                  |                    |                                                                         |                                                                   |                  |                                                                                                                                    |                                            |                                                                |                                                                                                                          |                                                                       |             |
| <b>Microtubule stability and organization</b>                                 | PPN077E06 | Microtubule-associated protein                                                   | AT3G04630          | protein with KLEEK protein-protein interaction domain                   | WVD2-LIKE 1                                                       | WDL1             |                                                                                                                                    |                                            |                                                                | Negative regulator of microtubule structure and stability                                                                |                                                                       | [1]         |
| <b>Protein degradation</b>                                                    |           |                                                                                  |                    |                                                                         |                                                                   |                  |                                                                                                                                    |                                            |                                                                |                                                                                                                          |                                                                       |             |
| <b>Ubiquitin ligase E3 complex/SFC-cullin</b>                                 | PPN032H05 | Cullin                                                                           | AT4G02570          | cullin family protein                                                   | AUXIN RESISTANT 6 ;CULLIN 1                                       | AXR6/CUL1        | AUX nuclear signaling                                                                                                              |                                            |                                                                |                                                                                                                          |                                                                       | [2-4]       |
| <b>RNA transcription regulation</b>                                           |           |                                                                                  |                    |                                                                         |                                                                   |                  |                                                                                                                                    |                                            |                                                                |                                                                                                                          |                                                                       |             |
| <b>MYB-family</b>                                                             | PPN055C11 | Sucrose responsive element binding protein                                       | AT5G67300          | myb family transcription factor                                         | ARABIDOPSIS THALIANA MYB DOMAIN PROTEIN 44                        | MYBR1/MYB44      | ABA, AUX, ET                                                                                                                       | Sucrose responsive element binding protein |                                                                |                                                                                                                          |                                                                       | [5-8]       |
| <b>Signal transduction pathway</b>                                            |           |                                                                                  |                    |                                                                         |                                                                   |                  |                                                                                                                                    |                                            |                                                                |                                                                                                                          |                                                                       |             |
| <b>G-protein coupled receptor protein signaling pathway/G-protein complex</b> | PPN065B10 | Guanine nucleotide binding protein (G-protein), alpha subunit family protein     | AT1G31930          | extra-large guanine nucleotide binding protein, putative / G-protein    | EXTRA-LARGE GTP-BINDING PROTEIN 3                                 | XLG3             | ABA, AUX, ET                                                                                                                       | sugar sensitivity                          |                                                                |                                                                                                                          |                                                                       | [9, 10]     |
| <b>Phosphorylation cascades/MAPK</b>                                          | PP1009F07 | Trichoderma-induced protein kinase                                               | AT3G45640          | mitogen-activated protein kinase                                        | MITOGEN-ACTIVATED PROTEIN KINASE 3                                | MPK3             | positive regulation of ACS type 1                                                                                                  |                                            | positive regulation of ACS type 1                              | pectin induced                                                                                                           |                                                                       | [11-14]     |
| <b>Phosphorylation cascades/MAPKKK</b>                                        | PPN071C11 | protein kinase family protein / ankyrin repeat family protein                    | AT1G14000          | protein kinase family protein / ankyrin repeat family protein           | VH1-INTERACTING KINASE                                            | VIK              | AUX and BR singaling                                                                                                               | sugar partioning and homeostasis           |                                                                | vascular formation,                                                                                                      |                                                                       | [15, 16]    |
| <b>Phosphorylation cascades/PP2A</b>                                          | PPN014G07 | Serine/threonine-protein phosphatase 2A 65 kDa regulatory subunit A beta isoform | AT3G25800          | serine/threonine protein phosphatase 2A 65 kDa regulatory subunit A     | PROTEIN PHOSPHATASE 2A SUBUNIT A2                                 | PDF1/PP2AA2      | Regulates PIN subcellular distribution                                                                                             |                                            |                                                                | cell polarity                                                                                                            |                                                                       | [17, 18]    |
| <b>Trafficking machinery and membrane dynamics</b>                            |           |                                                                                  |                    |                                                                         |                                                                   |                  |                                                                                                                                    |                                            |                                                                |                                                                                                                          |                                                                       |             |
| <b>CME;Vesicle coat/ clathrin coated vesicles</b>                             | PP1003H08 | Putative Clathrin coat assembly protein AP50                                     | AT5G46630          | clathrin adaptor complexes medium subunit family protein                | ADAPTOR PROTEIN-2 MU-ADAPTIN                                      | AP2M             | AUX signaling;regulates cellular auxin levels by controlling the abundance and distribution of PIN proteins at the plasma membrane |                                            |                                                                | regulates cellulose synthesis controlling the abundance and distribution of active CESA complexes at the plasma membrane | Cell polarity regulation                                              | [19, 20]    |
| <b>Fatty acid biosynthesis</b>                                                | PPN026B01 | Carboxyl transferase alpha subunit                                               | AT2G38040          | acetyl co-enzyme A carboxylase carboxyltransferase alpha subunit family | ACETYL CO-ENZYME A CARBOXYLASE CARBOXYLTRANSFERAS E ALPHA SUBUNIT | CAC3             |                                                                                                                                    |                                            | fatty acid biosynthesis                                        |                                                                                                                          |                                                                       | [21]        |
| <b>Glycerolipid biosynthesis</b>                                              | PPN008G03 | Digalactosyldiacylglycerol synthase 1, chloroplast precursor                     | AT3G11670          | digalactosyldiacylglycerol synthase 1                                   | DIGALACTOSYL DIACYLGLYCEROL DEFICIENT 1                           | DGD1             |                                                                                                                                    |                                            | digalactosyl diacylglycerol biosynthesis                       |                                                                                                                          | polar targeting of proteins to the plasma membrane;Lipid microdomains | [22-25]     |
| <b>Glycerolipid metabolism</b>                                                | PPN065F12 | phosphatidic acid phosphatase-related / PAP2-related                             | AT3G50920          | phosphatidic acid phosphatase-related / PAP2-related                    | LIPID PHOSPHATE PHOSPHATASE EPSILON 1                             | LPPEPSILON1      |                                                                                                                                    |                                            | diacylglycerol biosynthesis                                    |                                                                                                                          |                                                                       | [26]        |
| <b>Phospholipid biosynthesis</b>                                              | PPN008H07 | Putative phospholipid cytidylyltransferase                                       | AT2G38670          | ethanolamine-phosphate cytidylyltransferase                             | PHOSPHORYLETHANOLA MINE CYTHIDYLTRANSFERAS E 1                    | PECT1            |                                                                                                                                    |                                            | phosphoethanolamine biosynthesis                               |                                                                                                                          | polar targeting of proteins to the plasma membrane;Lipid microdomains | [23-25, 27] |
| <b>trans-Golgi network transport vesicle/ COPI vesicles</b>                   | PPN002C04 | ARF GTPase-activating domain-containing protein                                  | AT5G13300          | ARF GTPase-activating domain-containing protein                         | VASCULAR NETWORK DEFECTIVE 3;SCARFACE                             | VAN3/SFC         | AUX transport regulation;required for either normal PIN1 cycling or for PID-directed efflux machinery relocation                   |                                            |                                                                | regulates formation of plant vascular networks                                                                           | Cell polarity regulation                                              | [28, 29]    |
| <b>Transport</b>                                                              |           |                                                                                  |                    |                                                                         |                                                                   |                  |                                                                                                                                    |                                            |                                                                |                                                                                                                          |                                                                       |             |
| <b>carbohydrate transport</b>                                                 | PP1003F09 | Integral membrane protein,                                                       | AT1G75220          | vacuolar glucose exporter                                               | ERD6-LIKE 6                                                       | ERDL6            |                                                                                                                                    | sugar partioning and homeostasis           |                                                                |                                                                                                                          |                                                                       | [30]        |

|                                                                       |           |                                                           |           |                                                                                     |                                        |             |                                    |                                                                                                                                                   |          |
|-----------------------------------------------------------------------|-----------|-----------------------------------------------------------|-----------|-------------------------------------------------------------------------------------|----------------------------------------|-------------|------------------------------------|---------------------------------------------------------------------------------------------------------------------------------------------------|----------|
| <b>Cl-channel</b>                                                     | PPN078A03 | Cl-channel, voltage gated; IMP dehydrogenase related 1    | AT5G33280 | chloride channel-like protein                                                       | CHLORIDE CHANNEL G                     | CLCG        |                                    |                                                                                                                                                   |          |
| <b>Na/K antiporter</b>                                                | PPN064A01 | Na+/H+ antiporter                                         | AT2G01980 | sodium proton exchanger,                                                            | SALT OVERLY SENSITIVE 1                | SOS1        |                                    |                                                                                                                                                   | [31-33]  |
| <b>nitrate transport</b>                                              | PPN024D02 | Nitrate transporter NRT1-2                                | AT1G18880 | proton-dependent oligopeptide transport family protein                              | NITRATE TRANSPORTER 1.9                | NRT1.9      |                                    |                                                                                                                                                   |          |
| <b>oligopeptide transport</b>                                         | PPN005F03 | Oligopeptide transporter 7                                | AT4G10770 | oligopeptide transporter OPT family protein                                         | OLIGOPEPTIDE TRANSPORTER 7             | OPT7        |                                    |                                                                                                                                                   |          |
|                                                                       | PPN064F08 | POT family, putative                                      | AT1G59740 | proton-dependent oligopeptide transport (POT) family protein                        |                                        | NRT1/NPF4.3 |                                    |                                                                                                                                                   |          |
| <b>Unknown transporter</b>                                            | PPN066F09 | Putative integral membrane protein                        | AT5G19980 | Golgi-localized nucleotide-sugar transporter                                        | GOLGI NUCLEOTIDE SUGAR TRANSPORTER 4   | GONST4      | sugar partitioning and homeostasis | is probably involved in the provision of GDP-Fuc and GDP-l-Gal sugars into the Golgi for cell wall polysaccharide synthesis such as RG-II and XyG | [34-36]  |
| <b>Unknown function</b>                                               |           |                                                           |           |                                                                                     |                                        |             |                                    |                                                                                                                                                   |          |
| <b>Unknown interferon protein</b>                                     | PPN065A05 | interferon-related developmental regulator family protein | AT1G27760 | interferon-related developmental regulator family protein                           | SALT-TOLERANCE 32                      | SAT32       | ABA                                |                                                                                                                                                   | [37]     |
| <b>Unkown Zinc finger RING-like</b>                                   | PP1003D02 | ubiquitin ligase                                          | AT3G23280 | zinc finger (C3HC4-type RING finger) family protein / ankyrin repeat family protein | XB3 ORTHOLOG 5 IN ARABIDOPSIS THALIANA | XBAT35      | ET regulation,ABA, AUX             | glucose                                                                                                                                           | [38, 39] |
| <b>k-means2</b>                                                       |           |                                                           |           |                                                                                     |                                        |             |                                    |                                                                                                                                                   |          |
| <b>Aminoacid metabolism</b>                                           |           |                                                           |           |                                                                                     |                                        |             |                                    |                                                                                                                                                   |          |
| <b>Alanine and Aspartate metabolism</b>                               | PPN065C10 | Putative aspartate aminotransferase                       | AT1G80360 | methionine-specific aminotransferase                                                | REVERSAL OF SAV3 PHENOTYPE 1           | VAS1        |                                    | Negative regulation of Trp-IAA and ET biosynthesis                                                                                                | [40]     |
|                                                                       | PPN080E12 | Putative aspartate aminotransferase                       | AT1G80360 | methionine-specific aminotransferase                                                | REVERSAL OF SAV3 PHENOTYPE 1           | VAS1        |                                    | Negative regulation of Trp-IAA and ET biosynthesis                                                                                                | [40]     |
| <b>Cell wall related</b>                                              |           |                                                           |           |                                                                                     |                                        |             |                                    |                                                                                                                                                   |          |
| <b>cellulose biosynthesis</b>                                         | PPN046D09 | Cellulose synthase-like protein CslG                      | AT1G55850 | cellulose synthase family protein                                                   | CELLULOSE SYNTHASE LIKE E1             | CSLE1       |                                    | SCW biosynthesis;he micellulose biosynthesis                                                                                                      | [41]     |
| <b>Hemicellulose biosynthesis</b>                                     | PPN036E12 | Glycosyltransferase                                       | AT4G36890 | glycosyl transferase family 43 protein                                              | IRREGULAR XYLEM 14                     | IRX14       |                                    | SCW biosynthesis;he micellulose glucuronoxylan biosynthesis (SCW)                                                                                 | [42]     |
| <b>Hemicellulose degradation</b>                                      | PP1002E04 | Alpha-L-arabinofuranosidase / beta-D-xylosidase           | AT5G49360 | bifunctional {beta}-D-xylosidase/{alpha}-L-arabinofuranosidase                      | BETA-XYLOSIDASE 1                      | BXL1        |                                    | Pectin metabolism;trim b-xylan and a-arabinan side groups from the RG I.                                                                          | [43]     |
| <b>Pectin degradation</b>                                             | PPN041B11 | Polygalacturonase-inhibiting protein                      | AT5G06860 | polygalacturonase inhibiting protein 1                                              | POLYGALACTURONASE INHIBITING PROTEIN 1 | PGIP1       |                                    | inhibition of degradation of the polygalacturon an                                                                                                |          |
| <b>pectin methyl-esterification</b>                                   | PPN047G10 | Polygalacturonase-like protein                            | AT4G23500 | Pectin lyase-like superfamily protein                                               |                                        |             |                                    |                                                                                                                                                   |          |
|                                                                       | PP1004E01 | Putative pectinesterase                                   | AT2G26440 | pectinesterase family protein,                                                      |                                        |             |                                    |                                                                                                                                                   |          |
|                                                                       | PPN001F02 | pectinacetylerase family protein                          | AT5G23870 | pectinacetylerase family protein                                                    |                                        |             |                                    |                                                                                                                                                   |          |
|                                                                       | PPN066B05 | Ripening-related protein-like                             | AT5G51520 | invertase/pectin methylesterase inhibitor family protein..                          |                                        |             |                                    |                                                                                                                                                   |          |
| <b>UDP-L-arabinose, UDP-galacturonate and UDP-xylose Biosynthesis</b> | PPN062D06 | UDP-arabinose 4-epimerase 1                               | AT1G30620 | NAD-dependent epimerase/dehydratase family protein                                  | UDP-D-XYLOSE 4-EPIMERASE 1 ;MURUS 4    | UXE1/MUR4   | Sugar signaling                    | arabionoglactan biosynthesis                                                                                                                      | [44-47]  |
| <b>Protein degradation</b>                                            |           |                                                           |           |                                                                                     |                                        |             |                                    |                                                                                                                                                   |          |

|                                     |           |                                              |           |                                            |                                                                                                                                                                                                                                                 |               |                                                                                                                                                           |                                                       |                                                                                           |                                                                               |
|-------------------------------------|-----------|----------------------------------------------|-----------|--------------------------------------------|-------------------------------------------------------------------------------------------------------------------------------------------------------------------------------------------------------------------------------------------------|---------------|-----------------------------------------------------------------------------------------------------------------------------------------------------------|-------------------------------------------------------|-------------------------------------------------------------------------------------------|-------------------------------------------------------------------------------|
| <b>protease</b>                     | PP1004E07 | Putative serine protease                     | AT5G67360 | cucumis-like serine protease               | subtilisin-like serine protease 1.7                                                                                                                                                                                                             | SBT1.7/ARA12  |                                                                                                                                                           |                                                       | indirectly affects the pectin methylation status of mucilage and/or the primary cell wall | [48]                                                                          |
|                                     | PPN009E02 | Cysteine protease 14                         | AT4G35350 | cysteine endopeptidase                     | XYLEM CYSTEINE PEPTIDASE 1                                                                                                                                                                                                                      | XCP1          |                                                                                                                                                           |                                                       | SCW biosynthesis; positive regulation of thacheray element differentiation                | [49]                                                                          |
| <b>RNA transcription regulation</b> |           |                                              |           |                                            |                                                                                                                                                                                                                                                 |               |                                                                                                                                                           |                                                       |                                                                                           |                                                                               |
| <b>LUG-family</b>                   | PP1003C09 | STY-L protein                                | AT2G32700 | WD-40 repeat family protein                | MUCILAGE-MODIFIED 1 ;LEUNIG_HOMOLOG                                                                                                                                                                                                             | MUM1/LUH      |                                                                                                                                                           |                                                       | control mucilage production and extrusion                                                 | [50-52]                                                                       |
|                                     | PPN076D05 | Transcriptional corepressor LEUNIG           | AT4G32551 | WD-40 repeat family protein (LEUNIG)       | LEUNIG                                                                                                                                                                                                                                          | LUG           | AUX signaling regulator                                                                                                                                   |                                                       | control mucilage production and extrusion                                                 | [50-54].                                                                      |
| <b>NAC-family</b>                   | PPN054B06 | No apical meristem (NAM) protein-like        | AT4G28500 | no apical meristem (NAM) family protein    | NAC DOMAIN CONTAINING PROTEIN 73 ;SECONDARY WALL-ASSOCIATED NAC DOMAIN PROTEIN 2                                                                                                                                                                | anac073/SND2  |                                                                                                                                                           |                                                       | SCW biosynthesis; positive regulator of lignin, cellulose and hemicellulose biosynthesis  | [55, 56].                                                                     |
| <b>WRKY-family</b>                  | PPN059A06 | WRKY 13                                      | AT2G37260 | WRKY family transcription factor           | TRANSPARENT TESTA GLABRA 2 ;WRKY family transcription factor 44                                                                                                                                                                                 | TTG2/WRKY44   |                                                                                                                                                           | anthocyanin /proanthocyanin polymerization regulation | mucilage production regulation,                                                           | [57]                                                                          |
| <b>Secondary metabolism</b>         |           |                                              |           |                                            |                                                                                                                                                                                                                                                 |               |                                                                                                                                                           |                                                       |                                                                                           |                                                                               |
| <b>Anthocyanin metabolism</b>       | PPN007E12 | Anthocyanidin 3-O-glucosyltransferase        | AT3G50740 | UDPG:coniferyl alcohol glucosyltransferase | UDP-GLUCOSYL TRANSFERASE 72E1                                                                                                                                                                                                                   | UGT72E1       |                                                                                                                                                           |                                                       | SCW biosynthesis;lignin                                                                   | [58]                                                                          |
| <b>Carotenoid metabolism</b>        | PP1005H08 | Zeaxanthin epoxidase, chloroplast precursor  | AT5G67030 | zeaxanthin epoxidase                       | ABA DEFICIENT 1 ;LOW EXPRESSION OF OSMOTIC STRESS-RESPONSIVE GENES 6 ;NON-PHOTOCHEMICAL QUENCHING 2 ;ARABIDOPSIS THALIANA ZEAXANTHIN EPOXIDASE ;ZEAXANTHIN EPOXIDASE ;IMPAIRED IN ABA-INDUCED STERILITY 3 ;ARABIDOPSIS THALIANA ABA DEFICIENT 1 | ABA1/LOS6/ZEP | ABA biosynthesis                                                                                                                                          |                                                       | mucilage production regulation                                                            | [59, 60]                                                                      |
| <b>ET biosynthesis</b>              | PPN004H06 | 1-aminocyclopropane-1-carboxylate synthase 1 | AT3G61510 | 1-aminocyclopropane-1-carboxylate synthase | ACC SYNTHASE 1                                                                                                                                                                                                                                  | ACS1          |                                                                                                                                                           | ET biosynthesis                                       |                                                                                           | [61]                                                                          |
| <b>Phenylpropanoid metabolism</b>   | PPN025B05 | Cinnamoyl CoA reductase                      | AT1G15950 | cinnamoyl-CoA reductase                    | CINNAMOYL COA REDUCTASE 1 ; IRREGULAR XYLEM 4                                                                                                                                                                                                   | CCR1/IRX4     |                                                                                                                                                           |                                                       | SCW biosynthesis;lignin biosynthesis                                                      | [62]                                                                          |
|                                     | PPN053B11 | Cinnamyl alcohol dehydrogenase               | AT4G37980 | Cinnamyl alcohol dehydrogenase             | ELICITOR-ACTIVATED GENE 3-1 ;CINNAMYL-ALCOHOL DEHYDROGENASE 7                                                                                                                                                                                   | ELI3-1/CAD7   |                                                                                                                                                           |                                                       | SCW biosynthesis;lignin biosynthesis                                                      | [63]                                                                          |
| <b>Sterol metabolism</b>            | PPN012F12 | delta(14)-sterol reductase                   | AT3G52940 | delta(14)-sterol reductase                 | FAKEL ; HYDRA 2                                                                                                                                                                                                                                 | FK/HYD2       | AUX and ET crosstalk;regulate auxin transporters localization in plasma membrane microdomains lipid microdomain formation and in the secretion machinery. |                                                       | cellulose, callose and lignin, vascular development                                       | polar targeting of proteins to the plasma membrane;Lipid microdomains [64-67] |
|                                     | PPN063B12 | Helix-turn-helix, AraC type                  | AT4G37760 | squalene monooxygenase                     | SQUALENE EPOXIDASE 3                                                                                                                                                                                                                            | SQE3          |                                                                                                                                                           |                                                       |                                                                                           |                                                                               |
| <b>Terpene metabolism</b>           | PPN068G10 | Beta-amyrin synthase                         | AT1G78950 | beta-amyrin synthase                       | BETA-AMYRIN SYNTHASE                                                                                                                                                                                                                            | BAS           |                                                                                                                                                           |                                                       |                                                                                           |                                                                               |

**Signal transduction pathway**

|                                                                |           |                                                  |           |                                                                                     |                                                                                                                       |                      |         |                                               |                                                              |                                                                       |                  |
|----------------------------------------------------------------|-----------|--------------------------------------------------|-----------|-------------------------------------------------------------------------------------|-----------------------------------------------------------------------------------------------------------------------|----------------------|---------|-----------------------------------------------|--------------------------------------------------------------|-----------------------------------------------------------------------|------------------|
| <b>ABA signaling/ Ca signal transducer</b>                     | PPN069F09 | Putative serine/threonine protein kinase PK11-C1 | AT4G33950 | similar to abscisic acid-activated protein kinase                                   | OPEN STOMATA 1 ;SUCROSE NONFERMENTING 1-RELATED PROTEIN KINASE 2-6                                                    | OST1//SRK2E/SN RK2-6 | ABA     | Sucrose metabolism regulation                 |                                                              | [68-71]                                                               |                  |
| <b>ABA signaling/ABF phosphorylation</b>                       | PPN010B11 | Serine-threonine protein kinase, putative        | AT1G78290 | serine/threonine protein kinase                                                     | SNF1-RELATED PROTEIN KINASE 2.8 ;SNF1-RELATED PROTEIN KINASE 2C                                                       | SNRK2.8/SRK2C        | ABA     | sucrose signaling                             |                                                              | [72, 73]                                                              |                  |
| <b>Phosphorylation cascades/metabolic switch</b>               | PPN054E02 | AKIN beta3                                       | AT2G28060 | 5'-AMP-activated protein kinase beta-2 subunit protein                              |                                                                                                                       | KINβ3                | ABA     | sucrose signaling                             |                                                              | [72-75]                                                               |                  |
| <b>Trafficking machinery and membrane dynamics</b>             |           |                                                  |           |                                                                                     |                                                                                                                       |                      |         |                                               |                                                              |                                                                       |                  |
| <b>ER to Golgi</b>                                             | PP1003D05 | Root hair defective 3                            | AT3G13870 | root hair defective 3                                                               | GOLGI MUTANT 8 ;ROOT HAIR DEFECTIVE 3                                                                                 | RHD3/GOM8            | AUX, ET |                                               | required for cell wall biosynthesis and actin organization   | Cell polarity regulation                                              | [76, 77]         |
| <b>sphingolipid metabolism</b>                                 | PPN021D05 | similar to alkaline ceramidase                   | AT1G07380 | ceramidase family protein                                                           |                                                                                                                       |                      |         |                                               | Ceramide biosynthesis/degradation                            | polar targeting of proteins to the plasma membrane;Lipid microdomains | [66, 67, 78, 79] |
|                                                                | PPN031D01 | similar to alkaline ceramidase                   | AT1G07380 | ceramidase family protein                                                           |                                                                                                                       |                      |         |                                               | Ceramide biosynthesis/degradation                            | polar targeting of proteins to the plasma membrane;Lipid microdomains | [66, 67, 78, 79] |
| <b>Transport</b>                                               |           |                                                  |           |                                                                                     |                                                                                                                       |                      |         |                                               |                                                              |                                                                       |                  |
| <b>AUX efflux to the apoplast</b>                              | PPN070B12 | Multidrug resistance protein 11                  | AT3G28860 | ATP-binding cassette (ABC) transporters                                             | MULTIDRUG RESISTANCE PROTEIN 11 ;P-GLYCOPROTEIN 19 ATP-BINDING CASSETTE B19                                           | PGP19/MDR11/AB CB19  |         | AUX transport                                 |                                                              |                                                                       | [80-83]          |
| <b>AUX transport into ER</b>                                   | PP1004E09 | Auxin Efflux Carrier family protein.             | AT2G17500 | Endoplasmic reticulum auxin efflux carrier family protein                           |                                                                                                                       | PILS5                |         | AUX transport                                 |                                                              |                                                                       | [84, 85]         |
|                                                                | PPN075H08 | Auxin Efflux Carrier family protein.             | AT5G01990 | Endoplasmic reticulum auxin efflux carrier family protein                           |                                                                                                                       | PILS6                |         | AUX transport                                 |                                                              |                                                                       | [84, 85]         |
| <b>carbohydrate transport</b>                                  | PPN046B03 | Sorbitol transporter                             | AT3G18830 | plasma membrane-localized polyol/cyclitol/monosaccharid e-H <sup>+</sup> -symporter | ARABIDOPSIS THALIANA POLYOL/MONOSACCHARI DE TRANSPORTER 5 ;POLYOL/MONOSACCHA RIDE TRANSPORTER 5 ;POLYOL TRANSPORTER 5 | PMT5/PLT5            |         | sugar partitioning and homeostasis            |                                                              |                                                                       |                  |
| <b>Cooper transport ion transporter activity</b>               | PPN040A04 | Copper transport protein-like                    | AT5G59040 | copper transporter family protein                                                   | COPPER TRANSPORTER 3                                                                                                  | COPT3                |         |                                               |                                                              |                                                                       |                  |
|                                                                | PPN016B02 | Senescence-associated                            | AT2G17840 | senescence/dehydration-associated protein-related                                   | EARLY-RESPONSIVE TO DEHYDRATION 7                                                                                     | ERD7                 |         |                                               |                                                              |                                                                       |                  |
| <b>metal-ion transport</b>                                     | PP1005G08 | Metal tolerance protein C2                       | AT3G12100 | cation efflux family protein / metal tolerance protein                              | METAL TRANSPORT PROTEIN 5                                                                                             | MTP5                 |         |                                               |                                                              |                                                                       |                  |
|                                                                | PPN007G12 | Metal transporter Nramp3                         | AT2G23150 | NRAMP metal ion transporter 3                                                       | NATURAL RESISTANCE-ASSOCIATED MACROPHAGE PROTEIN 3                                                                    | ATNRAMP3             |         |                                               |                                                              |                                                                       |                  |
| <b>oligopeptide transport</b>                                  | PPN029A02 | Putative peptide transporter                     | AT3G01350 | proton-dependent oligopeptide transport family protein                              |                                                                                                                       |                      |         |                                               |                                                              |                                                                       |                  |
| <b>k-means1</b>                                                |           |                                                  |           |                                                                                     |                                                                                                                       |                      |         |                                               |                                                              |                                                                       |                  |
| <b>Energy production</b>                                       |           |                                                  |           |                                                                                     |                                                                                                                       |                      |         |                                               |                                                              |                                                                       |                  |
| <b>plasma membrane ATP production</b>                          | PPN027C11 | Plasma membrane proton ATPase                    | AT1G17260 | proton-exporting ATPase 10                                                          | AUTOINHIBITED H-ATPASE ISOFORM 10                                                                                     | AHA10                |         | proanthocyanidin transport and polymerization |                                                              | [86, 87]                                                              |                  |
| <b>RNA transcription regulation</b>                            |           |                                                  |           |                                                                                     |                                                                                                                       |                      |         |                                               |                                                              |                                                                       |                  |
| <b>b-HLH family</b>                                            | PPN080F10 | Prf interactor 30137                             | AT2G27230 | similar to basic helix-loop-helix(bHLH)-domain protein                              | LONESOME HIGHWAY                                                                                                      | LHW                  |         | AUX signaling                                 | Vascular establishment, maintenance, cell number and pattern | [88]                                                                  |                  |
| <b>HB-family</b>                                               | PPN069A12 | BEL1-like homeodomain transcription factor       | AT2G35940 | BEL1-like homeobox 4 protein                                                        | BEL1-LIKE HOMEODOMAIN 1                                                                                               | BLH1                 |         |                                               |                                                              | [89, 90]                                                              |                  |
| <b>Signal transduction pathway</b>                             |           |                                                  |           |                                                                                     |                                                                                                                       |                      |         |                                               |                                                              |                                                                       |                  |
| <b>AUX signaling/ AUX receptor E3 ubiquitin ligase SFC-TIR</b> | PPN078E01 | TRANSPORT INHIBITOR RESPONSE 1 protein           | AT3G62980 | E3 ubiquitin ligase SCF complex F-box subunit                                       | TRANSPORT INHIBITOR RESPONSE 1                                                                                        | TIR1                 |         | AUX nuclear signaling                         |                                                              | [2, 3]                                                                |                  |

|                                                                                                                                          |           |                                                                    |           |                                                                                                      |                                                                                                  |                     |                                                     |                                                                        |                                                                                      |           |
|------------------------------------------------------------------------------------------------------------------------------------------|-----------|--------------------------------------------------------------------|-----------|------------------------------------------------------------------------------------------------------|--------------------------------------------------------------------------------------------------|---------------------|-----------------------------------------------------|------------------------------------------------------------------------|--------------------------------------------------------------------------------------|-----------|
| <b>AUX signaling/Nuclear signaling pathway/ Calcium signaling/ Calcium sensor-transducer Calcium signaling/Calcium signal transducer</b> | PPN078G01 | Putative auxin-resistance protein                                  | AT1G05180 | auxin-resistance protein 1                                                                           | AUXIN RESISTANT 1                                                                                | AXR1                | AUX nuclear signaling                               |                                                                        | [2-4]                                                                                |           |
|                                                                                                                                          | PPN027B08 | Calcium-dependent protein kinase                                   | AT3G57530 | calcium-dependent protein kinase                                                                     | CALCIUM-DEPENDENT PROTEIN KINASE 32                                                              | CPK32               | ABA                                                 |                                                                        | [91]                                                                                 |           |
|                                                                                                                                          | PPN013H01 | Serine/threonine kinase                                            | AT5G58380 | CBL-interacting protein kinase 10                                                                    | CBL-INTERACTING PROTEIN KINASE 10 ;SNF1-RELATED PROTEIN KINASE 3.8 ;SOS3-INTERACTING PROTEIN 1 ; | CIPK10/SIP1/SNRK3.8 | ABA                                                 |                                                                        | [92]                                                                                 |           |
|                                                                                                                                          | PPN020F10 | CBL-interacting protein kinase                                     | AT4G30960 | CBL-interacting protein kinase 6                                                                     | CBL-INTERACTING PROTEIN KINASE 6 ;SOS3-INTERACTING PROTEIN 3 ;SNF1-RELATED PROTEIN KINASE 3.14   | SNRK3.14/CIPK6/SIP3 | ABA                                                 | sucrose signaling                                                      | [72, 73]                                                                             |           |
| <b>ET signaling</b>                                                                                                                      | PPN057C10 | Ethylene signaling protein                                         | AT5G03280 | ethylene-insensitive 2                                                                               | ETHYLENE INSENSITIVE 2                                                                           | EIN2                | ABA;positive regulator of ET signaling              | positive regulator of ACS type I and negative regulator of ACS type II | Vascular cell division regulation                                                    | [93-102]  |
| <b>ET signaling/ Culin E3 ubiquitin ligase</b>                                                                                           | PPN020G10 | Ethylene-overproduction protein 1                                  | AT3G51770 | tetratricopeptide repeat (TPR)-containing protein                                                    | ETHYLENE OVERPRODUCER 1                                                                          | ETO1                | repressor of ET biosynthesis (inhibits type II ACS) | repressor of ET biosynthesis (inhibits type II ACS)                    | vascular cell division                                                               | [102-104] |
| <b>Phosphorylation cascades/MAPK</b>                                                                                                     | PPN020H02 | Mitogen-activated protein kinase 4                                 | AT4G01370 | mitogen-activated protein kinase 4                                                                   | MAP KINASE 4                                                                                     | MPK4                |                                                     |                                                                        | Negative regulator of microtubule structure and stability; negative regulate MAP65-1 | [105]     |
| <b>Phosphorylation cascades/metabolic switch</b>                                                                                         | PPN008G11 | AKIN gamma                                                         | AT3G48530 | CBS domain-containing protein                                                                        | SNF1-RELATED PROTEIN KINASE REGULATORY SUBUNIT GAMMA                                             | KING1               | ABA                                                 | sucrose signaling                                                      |                                                                                      | [72-75]   |
| <b>Phosphorylation cascades/PP2A</b>                                                                                                     | PPN037E11 | Ser/thr protein phosphatase 2A regulatory subunit B' gamma isoform | AT4G15415 | serine/threonine protein phosphatase 2A (PP2A) regulatory subunit B'gamma                            | B' regulatory subunit of PP2A                                                                    | ATB'GAMMA           |                                                     | Yang Cycle regulation                                                  |                                                                                      | [106]     |
| <b>Transport</b>                                                                                                                         |           |                                                                    |           |                                                                                                      |                                                                                                  |                     |                                                     |                                                                        |                                                                                      |           |
| <b>carbohydrate transport</b>                                                                                                            | PPN025D11 | SLT1 protein                                                       | AT3G12570 | HSP20-like chaperones superfamily protein                                                            | FYD                                                                                              | FYD                 |                                                     | sugar partitioning and homeostasis                                     |                                                                                      |           |
|                                                                                                                                          | PPN078G04 | Putative membrane transporter                                      | AT2G43330 | Proton myo-inositol co-transporter                                                                   | INOSITOL TRANSPORTER 1                                                                           | INT1                |                                                     | sugar partitioning and homeostasis                                     |                                                                                      |           |
| <b>Cooper transport</b>                                                                                                                  | PPN025H09 | Putative copper-transporting ATPase 3                              | AT1G63440 | copper-exporting ATPase                                                                              | HEAVY METAL ATPASE 5                                                                             | HMA5                |                                                     |                                                                        |                                                                                      |           |
| <b>ion channel</b>                                                                                                                       | PPN023C11 | MscS-Like mechanosensitive ion channel                             | AT5G10490 | mechanosensitive ion channel domain-containing protein                                               | MSCS-LIKE 2                                                                                      | MSL2                |                                                     |                                                                        |                                                                                      |           |
| <b>Mg transport</b>                                                                                                                      | PPN001H12 | MRS2-5                                                             | AT2G03620 | magnesium transporter CorA-like family protein                                                       | MAGNESIUM TRANSPORTER 3                                                                          | MGT3                |                                                     |                                                                        |                                                                                      |           |
| <b>oligopeptide transport</b>                                                                                                            | PPN015D04 | Metal-nicotianamine transporter YSL6                               | AT3G27020 | oligopeptide transporter OPT family protein                                                          | YELLOW STRIPE LIKE 6                                                                             | YSL6                |                                                     |                                                                        |                                                                                      |           |
|                                                                                                                                          | PPN028F10 | Oligopeptide transporter OPT superfamily                           | AT5G55930 | oligopeptide transporter OPT family protein                                                          | OLIGOPEPTIDE TRANSPORTER 1                                                                       | OPT1                |                                                     |                                                                        |                                                                                      |           |
|                                                                                                                                          | PPN035B10 | Oligopeptide transporter 7                                         | AT4G10770 | oligopeptide transporter OPT family protein                                                          | OLIGOPEPTIDE TRANSPORTER 7                                                                       | OPT7                |                                                     |                                                                        |                                                                                      |           |
|                                                                                                                                          | PPN057F10 | Oligopeptide transporter-like protein                              | AT3G54450 | proton-dependent oligopeptide transport (POT) family protein                                         |                                                                                                  |                     |                                                     |                                                                        |                                                                                      |           |
| <b>k-means11</b>                                                                                                                         |           |                                                                    |           |                                                                                                      |                                                                                                  |                     |                                                     |                                                                        |                                                                                      |           |
| <b>Aminoacid metabolism</b>                                                                                                              |           |                                                                    |           |                                                                                                      |                                                                                                  |                     |                                                     |                                                                        |                                                                                      |           |
| <b>GABA biosynthesis</b>                                                                                                                 | PPN044B12 | Glutamate decarboxylase, putative                                  | AT3G17760 | glutamate decarboxylase, putative, similar to glutamate decarboxylase GB:Q07346 (Petunia x hybrid... | glutamate decarboxylase 5 (GAD5),                                                                | GAD5                |                                                     |                                                                        | [107]                                                                                |           |
| <b>Pyruvate and Reactive carbonyl species</b>                                                                                            |           |                                                                    |           |                                                                                                      |                                                                                                  |                     |                                                     |                                                                        |                                                                                      |           |
| <b>conversion of oxalacetate to PEP</b>                                                                                                  | PP1002C02 | Phosphoenolpyruvate carboxykinase [ATP]                            | AT4G37870 | phosphoenolpyruvate carboxykinase (ATP), putative / PEP carboxykinase, putative / PEPCK, putative... | PHOSPHOENOLPYRUVATE CARBOXYKINASE 1 , PHOSPHOENOLPYRUVATE CARBOXYKINASE ,                        | PEPCK,PCK1          |                                                     |                                                                        |                                                                                      |           |
| <b>Pyruvate conversion to acetyl-CoA</b>                                                                                                 | PPN054C12 | Pyruvate dehydrogenase                                             | AT1G59900 | pyruvate dehydrogenase E1 component alpha subunit                                                    | PYRUVATE DEHYDROGENASE COMPLEX E1 ALPHA SUBUNIT ;PYRUVATE DEHYDROGENASE COMPLEX E1 ALPHA         | PDHE1-A             |                                                     |                                                                        |                                                                                      |           |

|                                                                   |           |                                                        |           |                                                                                                      |                                                                                                                                                                               |               |                                                              |                                             |            |
|-------------------------------------------------------------------|-----------|--------------------------------------------------------|-----------|------------------------------------------------------------------------------------------------------|-------------------------------------------------------------------------------------------------------------------------------------------------------------------------------|---------------|--------------------------------------------------------------|---------------------------------------------|------------|
|                                                                   |           |                                                        |           |                                                                                                      | SUBUNIT                                                                                                                                                                       |               |                                                              |                                             |            |
| <b>pyruvate-lactate interconversions</b>                          | PPN059C05 | Pyruvate dehydrogenase E1 beta subunit isoform 3       | AT5G50850 | pyruvate dehydrogenase E1 component beta subunit                                                     | MACCI-BOU ,                                                                                                                                                                   | MABI/PDHE1-   |                                                              |                                             |            |
|                                                                   | PP1006E06 | Aldehyde dehydrogenase, putative                       | AT1G44170 | aldehyde dehydrogenase                                                                               | ALDEHYDE DEHYDROGENASE 3H1 , ALDEHYDE DEHYDROGENASE 4                                                                                                                         | ALDH4;ALDH3H1 | ABA                                                          |                                             | [108]      |
|                                                                   | PPN035E06 | Aldehyde dehydrogenase                                 | AT1G44170 | aldehyde dehydrogenase                                                                               | ALDEHYDE DEHYDROGENASE 3H1 , ALDEHYDE DEHYDROGENASE 4                                                                                                                         | ALDH4;ALDH3H1 | ABA                                                          |                                             | [108]      |
|                                                                   | PPN038B05 | Aldehyde dehydrogenase, putative                       | AT1G44170 | aldehyde dehydrogenase                                                                               | ALDEHYDE DEHYDROGENASE 3H1 , ALDEHYDE DEHYDROGENASE 4                                                                                                                         | ALDH4;ALDH3H1 | ABA                                                          |                                             | [108]      |
| <b>k-means5</b>                                                   |           |                                                        |           |                                                                                                      |                                                                                                                                                                               |               |                                                              |                                             |            |
| <b>Aminoacid metabolism</b>                                       |           |                                                        |           |                                                                                                      |                                                                                                                                                                               |               |                                                              |                                             |            |
| <b>cyanide detoxification</b>                                     | PPN075E10 | Beta-cyanoalanine synthase 1                           | AT3G61440 | encodes a cysteine synthase isomer                                                                   | CYSTEINE SYNTHASE C1                                                                                                                                                          | CYSC1         |                                                              |                                             | [109]      |
| <b>methionine metabolism</b>                                      | PPN034A06 | 1,2-dihydroxy-3-keto-5-methylthiopentene dioxygenase 4 | AT5G43850 | acireductone dioxygenase [iron(II)-requiring] activity                                               | acireductone dioxygenase 4                                                                                                                                                    | ARD4          | Yang Cycle                                                   | associated to vascular tissue               | [110, 111] |
|                                                                   | PPN034C12 | 1,2-dihydroxy-3-keto-5-methylthiopentene dioxygenase 3 | AT4G14710 | acireductone dioxygenase [iron(II)-requiring] activity                                               | acireductone dioxygenase 2                                                                                                                                                    | ARD2          | Yang Cycle                                                   | associated to vascular tissue               | [110, 111] |
|                                                                   | PPN072E05 | Cystathionine gamma synthase                           | AT3G01120 | cystathionine gamma-synthase, chloroplast / O-succinylhomoserine (Thiol)-lyase (CGS), identical t... | METHIONINE OVERACCUMULATION 1 (MTO1 ) , CYSTATHIONINE GAMMA-SYNTHASE (CGS ) , A. THALIANA CYSTATHIONINE GAMMA-SYNTHASE 1 (ATCYS1 ) , CYSTATHIONINE GAMMA-SYNTHASE 1 (CGS1 ) , | MTO1;CGS1     |                                                              |                                             | [112]      |
| <b>Antioxidant system</b>                                         |           |                                                        |           |                                                                                                      |                                                                                                                                                                               |               |                                                              |                                             |            |
| <b>GLUTATHIONE-GLUTAREDOXIN AND THIOREDOXIN REDOX HOMEOSTASIS</b> | PPN039H11 | Glutathione S-transferase                              | AT5G17220 | glutathione S-transferase                                                                            | TRANSPARENT TESTA 19 ;GLUTATHIONE S-TRANSFERASE PHI 12                                                                                                                        | TT19/GSTF12   |                                                              | proanthocyanin monomer transporter          | [113, 114] |
| <b>Cytoskeleton organization and biogenesis</b>                   |           |                                                        |           |                                                                                                      |                                                                                                                                                                               |               |                                                              |                                             |            |
| <b>actin microfilament-actin depolymerization</b>                 | PPN047E05 | Actin depolymerizing factor 2                          | AT5G59880 | actin-depolymerizing factor 3                                                                        | ACTIN DEPOLYMERIZING FACTOR 3                                                                                                                                                 | ADF3          |                                                              |                                             | [115, 116] |
| <b>Microtubule-Microtubule binding and stabilization</b>          | PPN073D05 | MICROTUBULE-ASSOCIATED PROTEINS                        | AT5G55230 | MICROTUBULE-ASSOCIATED PROTEINS                                                                      | MICROTUBULE-ASSOCIATED PROTEINS 65-1                                                                                                                                          | MAP65-1       |                                                              |                                             | [117, 118] |
| <b>Microtubule-microtubule organization and formation</b>         | PPN075E12 | Tubulin folding cofactor B                             | AT3G10220 | tubulin folding cofactor B                                                                           | EMBRYO DEFECTIVE 2804                                                                                                                                                         | EMB2804/TFC   |                                                              |                                             | [119]      |
| <b>RNA transcription regulation</b>                               |           |                                                        |           |                                                                                                      |                                                                                                                                                                               |               |                                                              |                                             |            |
| <b>AP2/EREBP family</b>                                           | PPN054F05 | AP2-related transcription factor                       | AT5G47220 | ethylene response factor subfamily B-3 of ERF/AP2 transcription factor                               | ETHYLENE RESPONSIVE ELEMENT BINDING FACTOR 2                                                                                                                                  | ERF2          | ET signaling                                                 | vascular cell division                      | [102, 120] |
| <b>AUX/IAA family</b>                                             | PPN014H03 | Auxin-induced protein AUX28                            | AT1G04250 | auxin-responsive protein / indoleacetic acid-induced protein 17                                      | INDOLE-3-ACETIC ACID INDUCIBLE 17 ;AUXIN RESISTANT 3                                                                                                                          | AXR3/IAA17    | AUX and ABA nuclear signaling; negative regulator            |                                             | [121]      |
|                                                                   | PPN057F01 | AUX/IAA protein                                        | AT4G29080 | auxin-responsive protein / indoleacetic acid-induced protein 27                                      | INDOLE-3-ACETIC ACID INDUCIBLE 27 ;PHYTOCHROME-ASSOCIATED PROTEIN 2                                                                                                           | PAP2/IAA27    | AUX nuclear signaling;negative regulator                     |                                             | [122, 123] |
| <b>LIM-family</b>                                                 | PPN009B01 | Pollen-specific protein SF3, putative                  | AT1G10200 | transcription factor LIM, putative                                                                   | widely expressed LIM protein 1                                                                                                                                                | WLIM1         |                                                              |                                             | [124]      |
|                                                                   | PPN069C01 | Transcription factor lim1                              | AT1G10200 | transcription factor LIM, putative                                                                   | widely expressed LIM protein 1                                                                                                                                                | WLIM1         | Actin stabilizing protein                                    | Actin stabilizing protein                   | [124]      |
| <b>MADS-box family</b>                                            | PP1006G03 | MADS-box transcription factor                          | AT5G60910 | agamous-like MADS box protein AGL8 / FRUITFULL                                                       | FRUITFULL ;AGAMOUS-LIKE 8                                                                                                                                                     | FUL/AGL8      | positive regulator of carotene and anthocyanin biosynthesis, | negative regulation of lignin               | [125-128]  |
|                                                                   | PPN042H02 | MADS4                                                  | AT4G18960 | floral homeotic protein AGAMOUS (AG), contains an ACG start codon                                    | AGAMOUS                                                                                                                                                                       | AG            | ET up-regulation                                             | postitive carotene biosynthesis regulation; | [129-131]  |

|                                                                                        |                           |                                                                                  |           |                                                                                 |                                                                              |              |                                                                                                                                                           |                                                                                                                |                                                                   |                |
|----------------------------------------------------------------------------------------|---------------------------|----------------------------------------------------------------------------------|-----------|---------------------------------------------------------------------------------|------------------------------------------------------------------------------|--------------|-----------------------------------------------------------------------------------------------------------------------------------------------------------|----------------------------------------------------------------------------------------------------------------|-------------------------------------------------------------------|----------------|
|                                                                                        |                           |                                                                                  |           | (Riechmann, Ito, and Meyerowitz...)                                             |                                                                              |              |                                                                                                                                                           |                                                                                                                | biosynthesis                                                      |                |
| <b>RNA translation and protein assembly</b>                                            |                           |                                                                                  |           |                                                                                 |                                                                              |              |                                                                                                                                                           |                                                                                                                |                                                                   |                |
| <b>regulation of protein biosynthesis</b>                                              | PPN006H04                 | Translationally-controlled tumor protein homolog                                 | AT3G16640 | translationally controlled tumor family protein                                 | TRANSLATIONALLY CONTROLLED TUMOR PROTEIN                                     | TCTP         | AUX cytoplasmic signaling                                                                                                                                 | Sugar signaling                                                                                                | Cell wall biosynthesis regulation                                 | [132, 133]     |
| <b>Secondary metabolism</b>                                                            |                           |                                                                                  |           |                                                                                 |                                                                              |              |                                                                                                                                                           |                                                                                                                |                                                                   |                |
| <b>Anthocyanin metabolism</b>                                                          | PpLDOX (PpLDOX) PPN055C03 | leucoanthocyanidin dioxygenase Anthocyanidin reductase                           | AT1G61720 | dihydroflavonol 4-reductase                                                     | BANYULS                                                                      | BAN          |                                                                                                                                                           |                                                                                                                | flavonoid/proanthocyanin biosynthesis proanthocyanin biosynthesis | [134]<br>[134] |
| <b>Aspartate biosynthesis</b>                                                          | PPN046D06                 | l-aminocyclopropane-1-carboxylate synthase                                       | AT1G62960 | aminotransferase with broad specificity for aspartate and aromatic amino acids  | ACC SYNTHASE 10                                                              | ACS10        |                                                                                                                                                           |                                                                                                                |                                                                   | [135]          |
| <b>Carotenoid metabolism</b>                                                           | PPN006A10                 | Phytoene synthase                                                                | AT5G17230 | phytoene synthase                                                               | PHYTOENE SYNTHASE                                                            | PSY          |                                                                                                                                                           |                                                                                                                |                                                                   |                |
|                                                                                        | PPN067A01                 | Capsanthin/capsorubin synthase, chloroplast precursor                            | AT3G10230 | lycopene beta cyclase                                                           | LYCOPENE CYCLASE                                                             | LYC          |                                                                                                                                                           |                                                                                                                |                                                                   |                |
| <b>cyanide detoxification</b>                                                          | PP1000E01                 | Cyanate hydratase                                                                | AT3G23490 | cyanate lyase family                                                            | CYANASE                                                                      | CYN          |                                                                                                                                                           |                                                                                                                |                                                                   | [136]          |
|                                                                                        | PPN066B01                 | Nitrilase/cyanide hydratase and apolipoprotein N-acyltransferase family protein; | AT5G12040 | Nitrilase/cyanide hydratase and apolipoprotein N-acyltransferase family protein |                                                                              |              |                                                                                                                                                           |                                                                                                                |                                                                   | [109, 137]     |
| <b>Flavonoid metabolism</b>                                                            | PPN050G05                 | Dihydroflavonol 4-reductase-like                                                 | AT5G58490 | cinnamoyl-CoA reductase family                                                  |                                                                              |              |                                                                                                                                                           |                                                                                                                | flavonoid/proanthocyanin biosynthesis                             | [138]          |
|                                                                                        | PPN052H09                 | Chalcone synthase 2                                                              | AT5G13930 | naringenin-chalcone synthase                                                    | CHALCONE SYNTHASE ;TRANSPARENT TESTA 4                                       | CHS/TT4      | negative regulation of auxin transport                                                                                                                    |                                                                                                                |                                                                   | [139, 140]     |
| <b>Signal transduction pathway</b>                                                     |                           |                                                                                  |           |                                                                                 |                                                                              |              |                                                                                                                                                           |                                                                                                                |                                                                   |                |
| <b>Cytoplasmic TOR signaling</b>                                                       | PPN076G10                 | protein LETHAL WITH SEC THIRTEEN 8-2                                             | AT3G18140 | transducin family protein / WD-40 repeat family protein                         | LETHAL WITH SEC THIRTEEN 8-1                                                 | LST8-1       | AUX cytoplasmic signaling                                                                                                                                 | Sugar signaling                                                                                                | Cell wall biosynthesis regulation                                 | [133, 141]     |
| <b>ET signaling/ET signal transduction</b>                                             | PPN011G11                 | GTP-binding protein                                                              | AT3G46060 | Ras-related protein/ small GTP-binding protein                                  | RAB GTPASE HOMOLOG 8A                                                        | ARA3/RAB8A   | ET signaling                                                                                                                                              |                                                                                                                |                                                                   | [142]          |
| <b>Trafficking machinery and membrane dynamics</b>                                     |                           |                                                                                  |           |                                                                                 |                                                                              |              |                                                                                                                                                           |                                                                                                                |                                                                   |                |
| <b>CME;Early endosome;internalization and intracellular trafficking of PM proteins</b> | PPN011F03                 | Clathrin_L-chain                                                                 | AT2G40060 | clathrin light chain                                                            | CLATHRIN LIGHT CHAIN 2                                                       | CLC2         | AUX signaling;regulates cellular auxin levels by controlling the abundance and distribution of PIN proteins at the plasma membrane                        |                                                                                                                | Cell polarity regulation                                          | [143]          |
| <b>CME;internalization and intracellular trafficking of PM proteins</b>                | PPN017G03                 | Calcium-binding EF-hand                                                          | AT3G01780 | cytokinesis adaptor protein targeted to the cell plate                          |                                                                              | TPLATE       | AUX signaling;regulates cellular auxin levels by controlling the abundance and distribution of PIN proteins at the plasma membrane                        | regulation of cellulose synthesis by controlling the abundance of active CESA complexes at the plasma membrane | Cell polarity regulation                                          | [144, 145]     |
| <b>Endosomal sorting complex</b>                                                       | PPN060A04                 | Putative endosomal Vps protein complex subunit                                   | AT5G22950 | SNF7 family protein                                                             | Vacuolar protein-sorting-associated protein 24                               | VPS24.1      | required for internalize PIN1, PIN2, and AUX1 to the MVB/late for vacuolar degradation                                                                    |                                                                                                                |                                                                   | [146]          |
| <b>Golgy to ER/ COPI vesicles</b>                                                      | PPN044E10                 | ARF-like small GTPase 1                                                          | AT2G47170 | ADP-ribosylation factor 1                                                       | ADP-ribosylation factor 1 AC1/bfa-visualized exocytic trafficking defective1 | ARF1A1C/BEX1 | Essential for recycling of PIN auxin transporters to the plasma membrane and for vacuolar targeting                                                       |                                                                                                                | cell polarity                                                     | [147]          |
| <b>Retromer complex;Late endosome to vacuole</b>                                       | PPN007G03                 | Sorting nexin-like protein                                                       | AT5G06140 | phox (PX) domain-containing protein                                             | SORTING NEXIN 1                                                              | SNX1         | Regulates both the recycling vacuolar sorting receptors (VSR) from the TGN/EE to the ER and the balance between vacuolar degradation and recycling of PIN |                                                                                                                |                                                                   | [148, 149]     |

|                                     |           |                                     |           |                                                                 |                                                      |              |                                                                                                                        | proteins       |
|-------------------------------------|-----------|-------------------------------------|-----------|-----------------------------------------------------------------|------------------------------------------------------|--------------|------------------------------------------------------------------------------------------------------------------------|----------------|
|                                     | PPN023B01 | Ras-related protein Rab7            | AT3G18820 | Ras-related GTP-binding protein                                 | RAB GTPASE HOMOLOG G3F                               | RABG3F/RAB7B |                                                                                                                        | [150]          |
| <b>k-means8</b>                     |           |                                     |           |                                                                 |                                                      |              |                                                                                                                        |                |
| <b>Aminoacid metabolism</b>         |           |                                     |           |                                                                 |                                                      |              |                                                                                                                        |                |
| <b>AUX biosynthesis</b>             | PPN058D11 | Anthranilate synthase beta subunit  | AT1G25220 | anthranilate synthase beta subunit                              | ANTHRANILATE SYNTHASE BETA SUBUNIT 1                 | ASB1         | AUX biosynthesis                                                                                                       | [151]          |
| <b>RNA transcription regulation</b> |           |                                     |           |                                                                 |                                                      |              |                                                                                                                        |                |
| <b>AUX/IAA family</b>               | PP1009D02 | IAA16 protein                       | AT1G04250 | auxin-responsive protein / indoleacetic acid-induced protein 17 | INDOLE-3-ACETIC ACID INDUCIBLE 17 ;AUXIN RESISTANT 3 | AXR3/IAA17   | AUX and ABA nuclear signaling; negative regulator                                                                      | [121]          |
|                                     | PPN060G07 | AUX/IAA protein                     | AT1G04240 | auxin-responsive protein / indoleacetic acid-induced protein 3  | INDOLE-3-ACETIC ACID INDUCIBLE 3;SHORT HYPOCOTYL 2   | IAA3/SHY2    | AUX nuclear signaling;negative regulator                                                                               | [152]          |
| <b>HD-ZIP family</b>                | PPN074H05 | HB2 homeodomain protein             | AT4G35550 | homeobox-leucine zipper protein (HB-2) / HD-ZIP protein         | WUSCHEL RELATED HOMEODOMAIN PROTEIN 13               | HB-4/WOX13   | AUX regulated                                                                                                          | [153, 154]     |
|                                     | PPN067A04 | MYB-like DNA-binding domain protein | AT4G38620 | myb family transcription factor                                 | MYB DOMAIN PROTEIN 4                                 | MYB4         | SCW biosynthesis;negative regulator lignin biosynthesis SCW biosynthesis;negative regulator lignin biosynthesis        | [155]          |
| <b>Signal transduction pathway</b>  |           |                                     |           |                                                                 |                                                      |              |                                                                                                                        |                |
| <b>ET signaling/ET receptor</b>     | PPN054G06 | Ethylene receptor                   | AT3G04580 | Ethylene receptor, subfamily 2.                                 | ETHYLENE INSENSITIVE 4                               | EIN4         | ET signaling                                                                                                           | [99, 156, 157] |
| <b>Transport</b>                    |           |                                     |           |                                                                 |                                                      |              |                                                                                                                        |                |
| <b>Cooper transport</b>             | PPN035H02 | Copper-transporting ATPase RAN1     | AT5G44790 | copper-exporting ATPase / responsive-to-antagonist 1            | RESPONSIVE-TO-ANTAGONIST 1 ;                         | RAN1         | ET signaling; delivers cooper ion into the ET receptors;is required for both ET binding and the receptor functionality | [158]          |

Abreviations: AUX:auxin; ET; ethylene; ABA: Abscisic acid; PM:plasma membrane;CW: cell wall; SCW: secondary cell wall; ER: endoplasmic reticulum; MVB/ LE:microvesicular body/ late endosome; TGN/ EE:trans-golgy network/ early endosome; VSR:vacuolar sorting receptors VN:vascular networks; PA: proanthocyanines; PIN; PIN formed auxin efflux carrier; RG:rhamnogalacturonan; XyG:xyloglucan

## References

- Perrin RM, Wang Y, Yuen CYL, Will J, Masson PH: **WVD2 is a novel microtubule-associated protein in Arabidopsis thaliana**. *The Plant Journal* 2007, **49**(6):961-971.
- Dharmasiri N, Dharmasiri S, Estelle M: **The F-box protein TIR1 is an auxin receptor**. *Nature* 2005, **435**(7041):441-445.
- Gray WM, Kepinski S, Rouse D, Leyser O, Estelle M: **Auxin regulates SCFTIR1-dependent degradation of AUX/ IAA proteins**. *Nature* 2001, **414**(6861):271-276.
- Kepinski S, Leyser O: **The Arabidopsis F-box protein TIR1 is an auxin receptor**. *Nature* 2005, **435**(7041):446-451.
- Lee B, Henderson D, Zhu J: **The Arabidopsis cold-responsive transcriptome and its regulation by ICE1**. *Plant Cell* 2005, **17**(11):3155 - 3175.
- Kranz HD, Denekamp M, Greco R, Jin H, Leyva A, Meissner RC, Petroni K, Urzainqui A, Bevan M, Martin C *et al*: **Towards functional characterisation of the members of theR2R3-MYBgene family fromArabidopsis thaliana**. *The Plant Journal* 1998, **16**(2):263-276.
- Jung C, Seo JS, Han SW, Koo YJ, Kim CH, Song SI, Nahm BH, Choi YD, Cheong J-J: **Overexpression of AtMYB44 Enhances Stomatal Closure to Confer Abiotic Stress Tolerance in Transgenic Arabidopsis**. *Plant Physiology* 2008, **146**(2):623-635.



8. Liu R, Chen L, Jia Z, Lü B, Shi H, Shao W, Dong H: **Transcription Factor AtMYB44 Regulates Induced Expression of the ETHYLENE INSENSITIVE2 Gene in Arabidopsis Responding to a Harpin Protein.** *Molecular Plant-Microbe Interactions* 2010, **24**(3):377-389.
9. Ding L, Pandey S, Assmann SM: **Arabidopsis extra-large G proteins (XLGs) regulate root morphogenesis.** *Plant J* 2008, **53**(2):248-263.
10. Pandey S, Monshausen GB, Ding L, Assmann SM: **Regulation of root-wave response by extra large and conventional G proteins in Arabidopsis thaliana.** *The Plant Journal* 2008, **55**(2):311-322.
11. Moscattiello R, Mariani P, Sanders D, Maathuis FJM: **Transcriptional analysis of calcium-dependent and calcium-independent signalling pathways induced by oligogalacturonides.** *Journal of Experimental Botany* 2006, **57**(11):2847-2865.
12. Taj G, Agarwal P, Grant M, Kumar A: **MAPK machinery in plants: Recognition and response to different stresses through multiple signal transduction pathways.** *Plant Signaling & Behavior* 2010, **5**(11):1370-1378.
13. Han L, Li G-J, Yang K-Y, Mao G, Wang R, Liu Y, Zhang S: **Mitogen-activated protein kinase 3 and 6 regulate Botrytis cinerea-induced ethylene production in Arabidopsis.** *The Plant Journal* 2010, **64**(1):114-127.
14. Li G, Meng X, Wang R, Mao G, Han L, Liu Y, Zhang S: **Dual-Level Regulation of ACC Synthase Activity by MPK3/MPK6 Cascade and Its Downstream WRKY Transcription Factor during Ethylene Induction in Arabidopsis.** *PLoS Genet* 2012, **8**(6):e1002767.
15. Ceserani T, Trofka A, Gandotra N, Nelson T: **VH1/BRL2 receptor-like kinase interacts with vascular-specific adaptor proteins VIT and VIK to influence leaf venation.** *The Plant Journal* 2009, **57**(6):1000-1014.
16. Wingenter K, Trentmann O, Winschuh I, Hörmiller II, Heyer AG, Reinders J, Schulz A, Geiger D, Hedrich R, Neuhaus HE: **A member of the mitogen-activated protein 3-kinase family is involved in the regulation of plant vacuolar glucose uptake.** *The Plant Journal* 2011, **68**(5):890-900.
17. Dai M, Zhang C, Kania U, Chen F, Xue Q, Mccray T, Li G, Qin G, Wakeley M, Terzaghi W *et al*: **A PP6-Type Phosphatase Holoenzyme Directly Regulates PIN Phosphorylation and Auxin Efflux in Arabidopsis.** *The Plant Cell Online* 2012, **24**(6):2497-2514.
18. Michniewicz M, Zago MK, Abas L, Weijers D, Schweighofer A, Meskiene I, Heisler MG, Ohno C, Zhang J, Huang F *et al*: **Antagonistic Regulation of PIN Phosphorylation by PP2A and PINOID Directs Auxin Flux.** *Cell* 2007, **130**(6):1044-1056.
19. Bashline L, Li S, Anderson CT, Lei L, Gu Y: **The Endocytosis of Cellulose Synthase in Arabidopsis Is Dependent on  $\mu$ 2, a Clathrin-Mediated Endocytosis Adaptor.** *Plant Physiology* 2013, **163**(1):150-160.
20. Kim SY, Xu Z-Y, Song K, Kim DH, Kang H, Reichardt I, Sohn EJ, Friml J, Juergens G, Hwang I: **Adaptor Protein Complex 2-Mediated Endocytosis Is Crucial for Male Reproductive Organ Development in Arabidopsis.** *The Plant Cell Online* 2013.
21. Tang F, Moore Jr TS: **Enzymes of the Primary Phosphatidylethanolamine Biosynthetic Pathway in Postgermination Castor Bean Endosperm (Developmental Profiles and Partial Purification of the Mitochondrial CTP:Ethanolaminephosphate Cytidyltransferase).** *Plant Physiology* 1997, **115**(4):1589-1597.
22. Klaus D, Härtel H, Fitzpatrick LM, Froehlich JE, Hubert J, Benning C, Dörmann P: **Digalactosyldiacylglycerol Synthesis in Chloroplasts of the Arabidopsis dgd1 Mutant.** *Plant Physiology* 2002, **128**(3):885-895.
23. Zhang C, Tian S: **Peach fruit acquired tolerance to low temperature stress by accumulation of linolenic acid and N-acylphosphatidylethanolamine in plasma membrane.** *Food Chemistry* 2010, **120**(3):864-872.
24. Degenkolbe T, Giavalisco P, Zuther E, Seiwert B, Hinch DK, Willmitzer L: **Differential remodeling of the lipidome during cold acclimation in natural accessions of Arabidopsis thaliana.** *The Plant Journal* 2012, **72**(6):972-982.
25. Szymanski J, Brotman Y, Willmitzer L, Cuadros-Inostroza Á: **Linking Gene Expression and Membrane Lipid Composition of Arabidopsis.** *The Plant Cell Online* 2014, **26**(3):915-928.
26. Nakamura Y, Tsuchiya M, Ohta H: **Plastidic Phosphatidic Acid Phosphatases Identified in a Distinct Subfamily of Lipid Phosphate Phosphatases with Prokaryotic Origin.** *Journal of Biological Chemistry* 2007, **282**(39):29013-29021.

27. Mizoi J, Nakamura M, Nishida I: **A Study of the Physiological Function of Phosphatidylethanolamine in Arabidopsis**. In: *Advanced Research on Plant Lipids*. Edited by Murata N, Yamada M, Nishida I, Okuyama H, Sekiya J, Hajime W: Springer Netherlands; 2003: 377-380.
28. Sieburth LE, Muday GK, King EJ, Benton G, Kim S, Metcalf KE, Meyers L, Seamen E, Van Norman JM: **SCARFACE Encodes an ARF-GAP That Is Required for Normal Auxin Efflux and Vein Patterning in Arabidopsis**. *The Plant Cell Online* 2006, **18**(6):1396-1411.
29. Koizumi K, Naramoto S, Sawa S, Yahara N, Ueda T, Nakano A, Sugiyama M, Fukuda H: **VAN3 ARF-GAP-mediated vesicle transport is involved in leaf vascular network formation**. *Development* 2005, **132**(7):1699-1711.
30. Poschet G, Hannich B, Raab S, Jungkuntz I, Klemens PAW, Krueger S, Neuhaus E, Büttner M: **A Novel Arabidopsis Vacuolar Glucose Exporter is involved in cellular Sugar Homeostasis and affects Composition of Seed Storage Compounds**. *Plant Physiology* 2011.
31. Shi H, Ishitani M, Kim C, Zhu J-K: **The Arabidopsis thaliana salt tolerance gene SOS1 encodes a putative Na<sup>+</sup>/ H<sup>+</sup> antiporter**. *Proceedings of the National Academy of Sciences* 2000, **97**(12):6896-6901.
32. Shi H, Quintero FJ, Pardo JM, Zhu J-K: **The Putative Plasma Membrane Na<sup>+</sup>/ H<sup>+</sup> Antiporter SOS1 Controls Long-Distance Na<sup>+</sup> Transport in Plants**. *The Plant Cell Online* 2002, **14**(2):465-477.
33. Quintero FJ, Ohta M, Shi H, Zhu J-K, Pardo JM: **Reconstitution in yeast of the Arabidopsis SOS signaling pathway for Na<sup>+</sup> homeostasis**. *Proceedings of the National Academy of Sciences* 2002, **99**(13):9061-9066.
34. Handford MG, Sicilia F, Brandizzi F, Chung JH, Dupree P: **Arabidopsis thaliana expresses multiple Golgi-localised nucleotide-sugar transporters related to GONST1**. *Molecular Genetics and Genomics* 2004, **272**(4):397-410.
35. Reyes F, Orellana A: **Golgi transporters: opening the gate to cell wall polysaccharide biosynthesis**. *Current Opinion in Plant Biology* 2008, **11**(3):244-251.
36. Wulff C, Norambuena L, Orellana A: **GDP-Fucose Uptake into the Golgi Apparatus during Xyloglucan Biosynthesis Requires the Activity of a Transporter-Like Protein Other Than the UDP-Glucose Transporter**. *Plant Physiology* 2000, **122**(3):867-878.
37. Park MY, Chung MS, Koh HS, Lee DJ, Ahn SJ, Kim CS: **Isolation and functional characterization of the Arabidopsis salt-tolerance 32 (AtSAT32) gene associated with salt tolerance and ABA signaling**. *Physiol Plant* 2009, **135**(4):426-435.
38. Carvalho SD, Saraiva R, Maia TM, Abreu IA, Duque P: **XBAT35, a Novel Arabidopsis RING E3 Ligase Exhibiting Dual Targeting of Its Splice Isoforms, Is Involved in Ethylene-Mediated Regulation of Apical Hook Curvature**. *Molecular Plant* 2012, **5**(6):1295-1309.
39. Yuan X, Zhang S, Liu S, Yu M, Su H, Shu H, Li X: **Global Analysis of Ankyrin Repeat Domain C3HC4-Type RING Finger Gene Family in Plants**. *PLoS One* 2013, **8**(3):e58003.
40. Zheng Z, Guo Y, Novák O, Dai X, Zhao Y, Ljung K, Noel JP, Chory J: **Coordination of auxin and ethylene biosynthesis by the aminotransferase VAS1**. *Nat Chem Biol* 2013, **9**(4):244-246.
41. Liepman AH, Wilkerson CG, Keegstra K: **Expression of cellulose synthase-like (Csl) genes in insect cells reveals that CslA family members encode mannan synthases**. *Proceedings of the National Academy of Sciences of the United States of America* 2005, **102**(6):2221-2226.
42. Lee C, Teng Q, Huang W, Zhong R, Ye Z-H: **The Arabidopsis Family GT43 Glycosyltransferases Form Two Functionally Nonredundant Groups Essential for the Elongation of Glucuronoxylan Backbone**. *Plant Physiology* 2010, **153**(2):526-541.
43. Arsovski AA, Popma TM, Haughn GW, Carpita NC, McCann MC, Western TL: **AtBXL1 Encodes a Bifunctional  $\beta$ -d-Xylosidase/  $\alpha$ -l-Arabinofuranosidase Required for Pectic Arabinan Modification in Arabidopsis Mucilage Secretory Cells**. *Plant Physiology* 2009, **150**(3):1219-1234.
44. Reiter W-D, Chapple C, Somerville CR: **Mutants of Arabidopsis thaliana with altered cell wall polysaccharide composition**. *The Plant Journal* 1997, **12**(2):335-345.
45. Burget EG, Reiter W-D: **The mur4 Mutant of Arabidopsis Is Partially Defective in the de Novo Synthesis of Uridine Diphosphol-Arabinose**. *Plant Physiology* 1999, **121**(2):383-390.

46. Burget EG, Verma R, Mølhøj M, Reiter W-D: **The Biosynthesis of l-Arabinose in Plants: Molecular Cloning and Characterization of a Golgi-Localized UDP-d-Xylose 4-Epimerase Encoded by the MUR4 Gene of Arabidopsis.** *The Plant Cell Online* 2003, **15**(2):523-531.
47. Li Y, Smith C, Corke F, Zheng L, Merali Z, Ryden P, Derbyshire P, Waldron K, Bevan MW: **Signaling from an Altered Cell Wall to the Nucleus Mediates Sugar-Responsive Growth and Development in Arabidopsis thaliana.** *The Plant Cell Online* 2007, **19**(8):2500-2515.
48. Rautengarten C, Usadel B, Neumetzler L, Hartmann J, Büssis D, Altmann T: **A subtilisin-like serine protease essential for mucilage release from Arabidopsis seed coats.** *The Plant Journal* 2008, **54**(3):466-480.
49. Funk V, Kositsup B, Zhao C, Beers EP: **The Arabidopsis Xylem Peptidase XCP1 Is a Tracheary Element Vacuolar Protein That May Be a Papain Ortholog.** *Plant Physiology* 2002, **128**(1):84-94.
50. Huang J, DeBowles D, Esfandiari E, Dean G, Carpita NC, Haughn GW: **The Arabidopsis Transcription Factor LUH/ MUM1 Is Required for Extrusion of Seed Coat Mucilage.** *Plant Physiology* 2011, **156**(2):491-502.
51. Bui M, Lim N, Sijacic P, Liu Z: **LEUNIG\_HOMOLOG and LEUNIG Regulate Seed Mucilage Extrusion in Arabidopsis.** *Journal of Integrative Plant Biology* 2011, **53**(5):399-408.
52. Walker M, Tehseen M, Doblin MS, Pettolino FA, Wilson S, Bacic T, Golz JF: **The transcriptional regulator LEUNIG\_HOMOLOG regulates mucilage release from the Arabidopsis testa.** *Plant Physiology* 2011.
53. Navarro C, Efremova N, Golz JF, Rubiera R, Kuckenberger M, Castillo R, Tietz O, Saedler H, Schwarz-Sommer Z: **Molecular and genetic interactions between STYLOSA and GRAMINIFOLIA in the control of Antirrhinum vegetative and reproductive development.** *Development* 2004, **131**(15):3649-3659.
54. Gonzalez D, Bowen AJ, Carroll TS, Conlan RS: **The Transcription Corepressor LEUNIG Interacts with the Histone Deacetylase HDA19 and Mediator Components MED14 (SWP) and CDK8 (HEN3) To Repress Transcription.** *Molecular and Cellular Biology* 2007, **27**(15):5306-5315.
55. Zhong R, Lee C, Zhou J, McCarthy RL, Ye Z-H: **A Battery of Transcription Factors Involved in the Regulation of Secondary Cell Wall Biosynthesis in Arabidopsis.** *The Plant Cell Online* 2008, **20**(10):2763-2782.
56. Hussey S, Mizrachi E, Spokevicius A, Bossinger G, Berger D, Myburg A: **SND2, a NAC transcription factor gene, regulates genes involved in secondary cell wall development in Arabidopsis fibres and increases fibre cell area in Eucalyptus.** *BMC Plant Biology* 2011, **11**(1):173.
57. Johnson CS, Kolevski B, Smyth DR: **TRANSPARENT TESTA GLABRA2, a Trichome and Seed Coat Development Gene of Arabidopsis, Encodes a WRKY Transcription Factor.** *The Plant Cell Online* 2002, **14**(6):1359-1375.
58. Lim E-K, Jackson RG, Bowles DJ: **Identification and characterisation of Arabidopsis glycosyltransferases capable of glucosylating coniferyl aldehyde and sinapyl aldehyde.** *FEBS Letters* 2005, **579**(13):2802-2806.
59. Marin E, Nussaume L, Quesada A, Gonneau M, Sotta B, Huguency P, Frey A, Marion-Poll A: **Molecular identification of zeaxanthin epoxidase of Nicotiana plumbaginifolia, a gene involved in abscisic acid biosynthesis and corresponding to the ABA locus of Arabidopsis thaliana.** *EMBO J* 1996, **15**(10):2331-2342.
60. Karszen CM, Brinkhorst-van der Swan DLC, Breekland AE, Koornneef M: **Induction of dormancy during seed development by endogenous abscisic acid: studies on abscisic acid deficient genotypes of Arabidopsis thaliana (L.) Heynh.** *Planta* 1983, **157**(2):158-165.
61. Liang X, Abel S, Keller JA, Shen NF, Theologis A: **The 1-aminocyclopropane-1-carboxylate synthase gene family of Arabidopsis thaliana.** *Proceedings of the National Academy of Sciences* 1992, **89**(22):11046-11050.
62. Jones L, Ennos AR, Turner SR: **Cloning and characterization of irregular xylem4 (irx4): a severely lignin-deficient mutant of Arabidopsis.** *The Plant Journal* 2001, **26**(2):205-216.
63. Kim S-J, Kim K-W, Cho M-H, Franceschi VR, Davin LB, Lewis NG: **Expression of cinnamyl alcohol dehydrogenases and their putative homologues during Arabidopsis thaliana growth and development: Lessons for database annotations?** *Phytochemistry* 2007, **68**(14):1957-1974.

64. Schrick K, Mayer U, Horrichs A, Kuhnt C, Bellini C, Dangl J, Schmidt J, Jürgens G: **FAKEL is a sterol C-14 reductase required for organized cell division and expansion in Arabidopsis embryogenesis.** *Genes & Development* 2000, **14**(12):1471-1484.
65. Pullen M, Clark N, Zarinkamar F, Topping J, Lindsey K: **Analysis of Vascular Development in the *hydra* Sterol Biosynthetic Mutants of Arabidopsis.** *PLoS One* 2010, **5**(8):e12227.
66. Laloï M, Perret A-M, Chatre L, Melser S, Cantrel C, Vaultier M-N, Zachowski A, Bathany K, Schmitter J-M, Vallet M *et al*: **Insights into the Role of Specific Lipids in the Formation and Delivery of Lipid Microdomains to the Plasma Membrane of Plant Cells.** *Plant Physiology* 2007, **143**(1):461-472.
67. Fischer U, Men S, Grebe M: **Lipid function in plant cell polarity.** *Current Opinion in Plant Biology* 2004, **7**(6):670-676.
68. Nakashima K, Fujita Y, Kanamori N, Katagiri T, Umezawa T, Kidokoro S, Maruyama K, Yoshida T, Ishiyama K, Kobayashi M *et al*: **Three Arabidopsis SnRK2 protein kinases, SRK2D/ SnRK2.2, SRK2E/ SnRK2.6/ OST1 and SRK2I/ SnRK2.3, involved in ABA signaling are essential for the control of seed development and dormancy.** *Plant Cell Physiol* 2009, **50**(7):1345-1363.
69. Boudsocq M, Droillard M-J, Barbier-Brygoo H, Laurière C: **Different phosphorylation mechanisms are involved in the activation of sucrose non-fermenting 1 related protein kinases 2 by osmotic stresses and abscisic acid.** *Plant Molecular Biology* 2007, **63**(4):491-503.
70. Fujii H, Verslues PE, Zhu JK: **Identification of two protein kinases required for abscisic acid regulation of seed germination, root growth, and gene expression in Arabidopsis.** *Plant Cell* 2007, **19**(2):485-494.
71. Suhita D, Raghavendra AS, Kwak JM, Vavasseur A: **Cytoplasmic Alkalization Precedes Reactive Oxygen Species Production during Methyl Jasmonate- and Abscisic Acid-Induced Stomatal Closure.** *Plant Physiology* 2004, **134**(4):1536-1545.
72. Cho Y-H, Hong J-W, Kim E-C, Yoo S-D: **Regulatory Functions of SnRK1 in Stress-Responsive Gene Expression and in Plant Growth and Development.** *Plant Physiology* 2012, **158**(4):1955-1964.
73. Coello P, Hey SJ, Halford NG: **The sucrose non-fermenting-1-related (SnRK) family of protein kinases: potential for manipulation to improve stress tolerance and increase yield.** *Journal of Experimental Botany* 2011, **62**(3):883-893.
74. Baena-Gonzalez E, Rolland F, Thevelein JM, Sheen J: **A central integrator of transcription networks in plant stress and energy signalling.** *Nature* 2007, **448**(7156):938-942.
75. Baena-González E, Sheen J: **Convergent energy and stress signaling.** *Trends in plant science* 2008, **13**(9):474-482.
76. Wang H, Lockwood SK, Hoeltzel MF, Schiefelbein JW: **The ROOT HAIR DEFECTIVE3 gene encodes an evolutionarily conserved protein with GTP-binding motifs and is required for regulated cell enlargement in Arabidopsis.** *Genes & Development* 1997, **11**(6):799-811.
77. Hu Y, Zhong R, Morrison Iii WH, Ye Z-H: **The Arabidopsis RHD3 gene is required for cell wall biosynthesis and actin organization.** *Planta* 2003, **217**(6):912-921.
78. Pata MO, Hannun YA, Ng CKY: **Plant sphingolipids: decoding the enigma of the Sphinx.** *New Phytologist* 2010, **185**(3):611-630.
79. Steponkus P, Uemura M, Webb M: **A contrast of the cryostability of the plasma membrane of winter rye and spring oat-two species that widely differ in their freezing tolerance and plasma membrane lipid composition.** *Advances in low-temperature biology* 1993, **2**:211-312.
80. Noh B, Murphy AS, Spalding EP: **Multidrug resistance-like genes of Arabidopsis required for auxin transport and auxin-mediated development.** *Plant Cell* 2001, **13**(11):2441-2454.
81. Wu G, Lewis DR, Spalding EP: **Mutations in Arabidopsis Multidrug Resistance-Like ABC Transporters Separate the Roles of Acropetal and Basipetal Auxin Transport in Lateral Root Development.** *The Plant Cell Online* 2007, **19**(6):1826-1837.
82. Blakeslee JJ, Bandyopadhyay A, Lee OR, Mravec J, Titapiwatanakun B, Sauer M, Makam SN, Cheng Y, Bouchard R, Adamec J *et al*: **Interactions among PIN-FORMED and P-Glycoprotein Auxin Transporters in Arabidopsis.** *The Plant Cell Online* 2007, **19**(1):131-147.
83. Zhao H, Liu L, Mo H, Qian L, Cao Y, Cui S, Li X, Ma L: **The ATP-Binding Cassette Transporter *ABCB19* Regulates Postembryonic Organ Separation in Arabidopsis.** *PLoS One* 2013, **8**(4):e60809.

84. Barbez E, Kubes M, Rolcik J, Beziat C, Pencik A, Wang B, Rosquete MR, Zhu J, Dobrev PI, Lee Y *et al*: **A novel putative auxin carrier family regulates intracellular auxin homeostasis in plants.** *Nature* 2012, **485**(7396):119-122.
85. Ruiz Rosquete M, Barbez E, Kleine-Vehn J: **Cellular Auxin Homeostasis: Gatekeeping Is Housekeeping.** *Molecular Plant* 2012, **5**(4):772-786.
86. Baxter IR, Young JC, Armstrong G, Foster N, Bogenschutz N, Cordova T, Peer WA, Hazen SP, Murphy AS, Harper JF: **A plasma membrane H<sup>+</sup>-ATPase is required for the formation of proanthocyanidins in the seed coat endothelium of Arabidopsis thaliana.** *Proceedings of the National Academy of Sciences of the United States of America* 2005, **102**(7):2649-2654.
87. Marinova K, Pourcel L, Weder B, Schwarz M, Barron D, Routaboul J-M, Debeaujon I, Klein M: **The Arabidopsis MATE Transporter TT12 Acts as a Vacuolar Flavonoid/ H<sup>+</sup>-Antiporter Active in Proanthocyanidin-Accumulating Cells of the Seed Coat.** *The Plant Cell Online* 2007, **19**(6):2023-2038.
88. Ohashi-Ito K, Matsukawa M, Fukuda H: **An Atypical bHLH Transcription Factor Regulates Early Xylem Development Downstream of Auxin.** *Plant and Cell Physiology* 2013, **54**(3):398-405.
89. Gong Q, Li P, Ma S, Indu Rupassara S, Bohnert HJ: **Salinity stress adaptation competence in the extremophile Thellungiella halophila in comparison with its relative Arabidopsis thaliana.** *The Plant Journal* 2005, **44**(5):826-839.
90. Huang D, Wu W, Abrams SR, Cutler AJ: **The relationship of drought-related gene expression in Arabidopsis thaliana to hormonal and environmental factors.** *Journal of Experimental Botany* 2008, **59**(11):2991-3007.
91. Choi HI, Park HJ, Park JH, Kim S, Im MY, Seo HH, Kim YW, Hwang I, Kim SY: **Arabidopsis calcium-dependent protein kinase AtCPK32 interacts with ABF4, a transcriptional regulator of abscisic acid-responsive gene expression, and modulates its activity.** *Plant Physiol* 2005, **139**(4):1750-1761.
92. Weinl S, Kudla J: **The CBL–CIPK Ca<sup>2+</sup>-decoding signaling network: function and perspectives.** *New Phytologist* 2009, **184**(3):517-528.
93. Alonso JM, Hirayama T, Roman G, Nourizadeh S, Ecker JR: **EIN2, a Bifunctional Transducer of Ethylene and Stress Responses in Arabidopsis.** *Science* 1999, **284**(5423):2148-2152.
94. Beaudoin N, Serizet C, Gosti F, Giraudat J: **Interactions between Abscisic Acid and Ethylene Signaling Cascades.** *The Plant Cell Online* 2000, **12**(7):1103-1115.
95. Ghassemian M, Nambara E, Cutler S, Kawaide H, Kamiya Y, McCourt P: **Regulation of Abscisic Acid Signaling by the Ethylene Response Pathway in Arabidopsis.** *The Plant Cell Online* 2000, **12**(7):1117-1126.
96. Shibuya K, Barry KG, Ciardi JA, Loucas HM, Underwood BA, Nourizadeh S, Ecker JR, Klee HJ, Clark DG: **The Central Role of PhEIN2 in Ethylene Responses throughout Plant Development in Petunia.** *Plant Physiology* 2004, **136**(2):2900-2912.
97. Wang Y, Liu C, Li K, Sun F, Hu H, Li X, Zhao Y, Han C, Zhang W, Duan Y *et al*: **Arabidopsis EIN2 modulates stress response through abscisic acid response pathway.** *Plant Molecular Biology* 2007, **64**(6):633-644.
98. Begheldo M, Manganaris GA, Bonghi C, Tonutti P: **Different postharvest conditions modulate ripening and ethylene biosynthetic and signal transduction pathways in Stony Hard peaches.** *Postharvest Biol Technol* 2008, **48**(1):8-8.
99. Shi Y, Tian S, Hou L, Huang X, Zhang X, Guo H, Yang S: **Ethylene signaling negatively regulates freezing tolerance by repressing expression of CBF and type-A ARR genes in Arabidopsis.** *Plant Cell* 2012, **24**(6):2578-2595.
100. Vandenbussche F, Vaseva I, Vissenberg K, Van Der Straeten D: **Ethylene in vegetative development: a tale with a riddle.** *New Phytologist* 2012, **194**(4):895-909.
101. Thain SC, Vandenbussche F, Laarhoven LJJ, Dowson-Day MJ, Wang Z-Y, Tobin EM, Harren FJM, Millar AJ, Van Der Straeten D: **Circadian Rhythms of Ethylene Emission in Arabidopsis.** *Plant Physiology* 2004, **136**(3):3751-3761.
102. Etchells JP, Provost CM, Turner SR: **Plant Vascular Cell Division Is Maintained by an Interaction between PXY and Ethylene Signalling.** *PLoS Genet* 2012, **8**(11):e1002997.
103. Woeste KE, Ye C, Kieber JJ: **Two Arabidopsis Mutants That Overproduce Ethylene Are Affected in the Posttranscriptional Regulation of 1-Aminocyclopropane-1-Carboxylic Acid Synthase.** *Plant Physiology* 1999, **119**(2):521-530.

104. Wang KLC, Yoshida H, Lurin C, Ecker JR: **Regulation of ethylene gas biosynthesis by the Arabidopsis ETO1 protein.** *Nature* 2004, **428**(6986):945-950.
105. Beck M, Komis G, Müller J, Menzel D, Šamaj J: **Arabidopsis Homologs of Nucleus- and Phragmoplast-Localized Kinase 2 and 3 and Mitogen-Activated Protein Kinase 4 Are Essential for Microtubule Organization.** *The Plant Cell Online* 2010, **22**(3):755-771.
106. Trotta A, Wrzaczek M, Scharte J, Tikkanen M, Konert G, Rahikainen M, Holmström M, Hiltunen H-M, Rips S, Sipari N *et al*: **Regulatory Subunit B' of Protein Phosphatase 2A Prevents Unnecessary Defense Reactions under Low Light in Arabidopsis.** *Plant Physiology* 2011, **156**(3):1464-1480.
107. Bouché N, Fait A, Zik M, Fromm H: **The root-specific glutamate decarboxylase (GAD1) is essential for sustaining GABA levels in Arabidopsis.** *Plant Molecular Biology* 2004, **55**(3):315-325.
108. Kirch H-H, Nair A, Bartels D: **Novel ABA- and dehydration-inducible aldehyde dehydrogenase genes isolated from the resurrection plant Craterostigma plantagineum and Arabidopsis thaliana.** *The Plant Journal* 2001, **28**(5):555-567.
109. Yip W-K, Yang SF: **Cyanide Metabolism in Relation to Ethylene Production in Plant Tissues.** *Plant Physiology* 1988, **88**(2):473-476.
110. Pommerrenig B, Feussner K, Zierer W, Rabinovych V, Klebl F, Feussner I, Sauer N: **Phloem-Specific Expression of Yang Cycle Genes and Identification of Novel Yang Cycle Enzymes in Plantago and Arabidopsis.** *The Plant Cell Online* 2011, **23**(5):1904-1919.
111. Van de Poel B, Bulens I, Markoula A, Hertog MLATM, Dreesen R, Wirtz M, Vandoninck S, Oppermann Y, Keulemans J, Hell R *et al*: **Targeted Systems Biology Profiling of Tomato Fruit Reveals Coordination of the Yang Cycle and a Distinct Regulation of Ethylene Biosynthesis during Postclimacteric Ripening.** *Plant Physiology* 2012, **160**(3):1498-1514.
112. Inaba K, Fujiwara T, Hayashi H, Chino M, Komeda Y, Naito S: **Isolation of an Arabidopsis thaliana Mutant, mto1, That Overaccumulates Soluble Methionine (Temporal and Spatial Patterns of Soluble Methionine Accumulation).** *Plant Physiology* 1994, **104**(3):881-887.
113. Kitamura S, Matsuda F, Tohge T, Yonekura-Sakakibara K, Yamazaki M, Saito K, Narumi I: **Metabolic profiling and cytological analysis of proanthocyanidins in immature seeds of Arabidopsis thaliana flavonoid accumulation mutants.** *The Plant Journal* 2010, **62**(4):549-559.
114. Kitamura S, Shikazono N, Tanaka A: **TRANSPARENT TESTA 19 is involved in the accumulation of both anthocyanins and proanthocyanidins in Arabidopsis.** *The Plant Journal* 2004, **37**(1):104-114.
115. Danyluk J, Carpentier E, Sarhan F: **Identification and characterization of a low temperature regulated gene encoding an actin-binding protein from wheat.** *FEBS Letters* 1996, **389**(3):324-327.
116. Ouellet F, Carpentier É, Cope MJTV, Monroy AF, Sarhan F: **Regulation of a Wheat Actin-Depolymerizing Factor during Cold Acclimation.** *Plant Physiology* 2001, **125**(1):360-368.
117. Mao T, Jin L, Li H, Liu B, Yuan M: **Two Microtubule-Associated Proteins of the Arabidopsis MAP65 Family Function Differently on Microtubules.** *Plant Physiology* 2005, **138**(2):654-662.
118. Zhang Q, Lin F, Mao T, Nie J, Yan M, Yuan M, Zhang W: **Phosphatidic Acid Regulates Microtubule Organization by Interacting with MAP65-1 in Response to Salt Stress in Arabidopsis.** *The Plant Cell Online* 2012, **24**(11):4555-4576.
119. Steinborn K, Maulbetsch C, Priester B, Trautmann S, Pacher T, Geiges B, Küttner F, Lepiniec L, Stierhof Y-D, Schwarz H *et al*: **The Arabidopsis PILZ group genes encode tubulin-folding cofactor orthologs required for cell division but not cell growth.** *Genes & Development* 2002, **16**(8):959-971.
120. Ohta M, Ohme-Takagi M, Shinshi H: **Three ethylene-responsive transcription factors in tobacco with distinct transactivation functions.** *The Plant Journal* 2000, **22**(1):29-38.
121. Belin C, Megies C, Hauserova E, Lopez-Molina L: **Abscisic acid represses growth of the Arabidopsis embryonic axis after germination by enhancing auxin signaling.** *Plant Cell* 2009, **21**(8):2253-2268.
122. Borevitz JO, Xia Y, Blount J, Dixon RA, Lamb C: **Activation Tagging Identifies a Conserved MYB Regulator of Phenylpropanoid Biosynthesis.** *The Plant Cell Online* 2000, **12**(12):2383-2393.

123. Cominelli E, Gusmaroli G, Allegra D, Galbiati M, Wade HK, Jenkins GI, Tonelli C: **Expression analysis of anthocyanin regulatory genes in response to different light qualities in *Arabidopsis thaliana***. *Journal of Plant Physiology* 2008, **165**(8):886-894.
124. Moes D, Gatti S, Hoffmann C, Dieterle M, Moreau F, Neumann K, Schumacher M, Diederich M, Grill E, Shen W-H *et al*: **A LIM Domain Protein from Tobacco Involved in Actin-Bundling and Histone Gene Transcription**. *Molecular Plant* 2012.
125. Bemer M, Karlova R, Ballester AR, Tikunov YM, Bovy AG, Wolters-Arts M, Rossetto PdB, Angenent GC, de Maagd RA: **The Tomato FRUITFULL Homologs TDR4/ FUL1 and MBP7/ FUL2 Regulate Ethylene-Independent Aspects of Fruit Ripening**. *The Plant Cell Online* 2012, **24**(11):4437-4451.
126. Jaakola L, Poole M, Jones MO, Kämäräinen-Karppinen T, Koskimäki JJ, Hohtola A, Häggman H, Fraser PD, Manning K, King GJ *et al*: **A SQUAMOSA MADS Box Gene Involved in the Regulation of Anthocyanin Accumulation in Bilberry Fruits**. *Plant Physiology* 2010, **153**(4):1619-1629.
127. Tani E, Polidoros AN, Tsaftaris AS: **Characterization and expression analysis of FRUITFULL- and SHATTERPROOF-like genes from peach (*Prunus persica*) and their role in split-pit formation**. *Tree Physiology* 2007, **27**(5):649-659.
128. Ferrandiz C, Liljegren SJ, Yanofsky MF: **Negative regulation of the SHATTERPROOF genes by FRUITFULL during Arabidopsis fruit development**. *Science* 2000, **289**(5478):436-438.
129. Itkin M, Seybold H, Breitel D, Rogachev I, Meir S, Aharoni A: **TOMATO AGAMOUS-LIKE 1 is a component of the fruit ripening regulatory network**. *The Plant Journal* 2009, **60**(6):1081-1095.
130. Vrebalov J, Pan IL, Arroyo AJM, McQuinn R, Chung M, Poole M, Rose J, Seymour G, Grandillo S, Giovannoni J *et al*: **Fleshy Fruit Expansion and Ripening Are Regulated by the Tomato SHATTERPROOF Gene TAGL1**. *The Plant Cell Online* 2009, **21**(10):3041-3062.
131. Giménez E, Pineda B, Capel J, Antón MT, Atarés A, Pérez-Martín F, García-Sogo B, Angosto T, Moreno V, Lozano R: **Functional Analysis of the *Arlequin* Mutant Corroborates the Essential Role of the *ARLEQUIN/ TAGL1* Gene during Reproductive Development of Tomato**. *PLoS One* 2010, **5**(12):e14427.
132. Berkowitz O, Jost R, Pollmann S, Masle J: **Characterization of TCTP, the Translationally Controlled Tumor Protein, from Arabidopsis thaliana**. *The Plant Cell Online* 2008, **20**(12):3430-3447.
133. Leiber R-M, John F, Verhertbruggen Y, Diet A, Knox JP, Ringli C: **The TOR Pathway Modulates the Structure of Cell Walls in Arabidopsis**. *The Plant Cell Online* 2010, **22**(6):1898-1908.
134. Devic M, Guillemot J, Debeaujon I, Bechtold N, Bensaude E, Koornneef M, Pelletier G, Delseny M: **The BANYULS gene encodes a DFR-like protein and is a marker of early seed coat development**. *The Plant Journal* 1999, **19**(4):387-398.
135. Yamagami T, Tsuchisaka A, Yamada K, Haddon WF, Harden LA, Theologis A: **Biochemical Diversity among the 1-Amino-cyclopropane-1-Carboxylate Synthase Isozymes Encoded by the Arabidopsis Gene Family**. *Journal of Biological Chemistry* 2003, **278**(49):49102-49112.
136. Qian D, Jiang L, Lu L, Wei C, Li Y: **Biochemical and Structural Properties of Cyanases from *Arabidopsis thaliana* and *Oryza sativa***. *PLoS One* 2011, **6**(3):e18300.
137. Piotrowski M, Schönfelder S, Weiler EW: **The Arabidopsis thaliana Isogene NIT4 and Its Orthologs in Tobacco Encode  $\beta$ -Cyano-L-alanine Hydratase/ Nitrilase**. *Journal of Biological Chemistry* 2001, **276**(4):2616-2621.
138. Shirley BW, Hanley S, Goodman HM: **Effects of ionizing radiation on a plant genome: analysis of two Arabidopsis transparent testa mutations**. *The Plant Cell Online* 1992, **4**(3):333-347.
139. Li J, Ou-Lee TM, Raba R, Amundson RG, Last RL: **Arabidopsis Flavonoid Mutants Are Hypersensitive to UV-B Irradiation**. *The Plant Cell Online* 1993, **5**(2):171-179.
140. Brown DE, Rashotte AM, Murphy AS, Normanly J, Tague BW, Peer WA, Taiz L, Muday GK: **Flavonoids act as negative regulators of auxin transport in vivo in arabidopsis**. *Plant Physiol* 2001, **126**(2):524-535.

141. Moreau M, Azzopardi M, Clément G, Dobrenel T, Marchive C, Renne C, Martin-Magniette M-L, Taconnat L, Renou J-P, Robaglia C *et al*: **Mutations in the Arabidopsis Homolog of LST8/ GβL, a Partner of the Target of Rapamycin Kinase, Impair Plant Growth, Flowering, and Metabolic Adaptation to Long Days.** *The Plant Cell Online* 2012, **24**(2):463-481.
142. Moshkov IE, Mur LAJ, Novikova GV, Smith AR, Hall MA: **Ethylene Regulates Monomeric GTP-Binding Protein Gene Expression and Activity in Arabidopsis.** *Plant Physiology* 2003, **131**(4):1705-1717.
143. Wang C, Yan X, Chen Q, Jiang N, Fu W, Ma B, Liu J, Li C, Bednarek SY, Pan J: **Clathrin Light Chains Regulate Clathrin-Mediated Trafficking, Auxin Signaling, and Development in Arabidopsis.** *The Plant Cell Online* 2013.
144. Van Damme D, Coutuer S, De Rycke R, Bouget F-Y, Inzé D, Geelen D: **Somatic Cytokinesis and Pollen Maturation in Arabidopsis Depend on TPLATE, Which Has Domains Similar to Coat Proteins.** *The Plant Cell Online* 2006, **18**(12):3502-3518.
145. Gadeyne A, Sánchez-Rodríguez C, Vanneste S, Di Rubbo S, Zauber H, Vanneste K, Van Leene J, De Winne N, Eeckhout D, Persiau G *et al*: **The TPLATE Adaptor Complex Drives Clathrin-Mediated Endocytosis in Plants.** *Cell*, **156**(4):691-704.
146. Spitzer C, Reyes FC, Buono R, Sliwinski MK, Haas TJ, Otegui MS: **The ESCRT-Related CHMP1A and B Proteins Mediate Multivesicular Body Sorting of Auxin Carriers in Arabidopsis and Are Required for Plant Development.** *The Plant Cell Online* 2009, **21**(3):749-766.
147. Tanaka H, Nodzyński T, Kitakura S, Feraru MI, Sasabe M, Ishikawa T, Kleine-Vehn J, Kakimoto T, Friml J: **BEX1/ ARF1A1C is Required for BFA-Sensitive Recycling of PIN Auxin Transporters and Auxin-Mediated Development in Arabidopsis.** *Plant and Cell Physiology* 2014, **55**(4):737-749.
148. Niemes S, Labs M, Scheuring D, Krueger F, Langhans M, Jesenofsky B, Robinson DG, Pimpl P: **Sorting of plant vacuolar proteins is initiated in the ER.** *The Plant Journal* 2010, **62**(4):601-614.
149. Kleine-Vehn J, Leitner J, Zwiewka M, Sauer M, Abas L, Luschnig C, Friml J: **Differential degradation of PIN2 auxin efflux carrier by retromer-dependent vacuolar targeting.** *Proceedings of the National Academy of Sciences* 2008, **105**(46):17812-17817.
150. Zelazny E, Santambrogio M, Pourcher M, Chambrier P, Berne-Dedieu A, Fobis-Loisy I, Miège C, Jaillais Y, Gaude T: **Mechanisms Governing the Endosomal Membrane Recruitment of the Core Retromer in Arabidopsis.** *Journal of Biological Chemistry* 2013, **288**(13):8815-8825.
151. Stepanova AN, Hoyt JM, Hamilton AA, Alonso JM: **A Link between ethylene and auxin uncovered by the characterization of two root-specific ethylene-insensitive mutants in Arabidopsis.** *Plant Cell* 2005, **17**(8):2230-2242.
152. Tian Q, Reed JW: **Control of auxin-regulated root development by the Arabidopsis thaliana SHY2/ IAA3 gene.** *Development* 1999, **126**(4):711-721.
153. Romera-Branchat M, Ripoll JJ, Yanofsky MF, Pelaz S: **The WOX13 homeobox gene promotes replum formation in the Arabidopsis thaliana fruit.** *The Plant Journal* 2013, **73**(1):37-49.
154. Vanneste S, De Rybel B, Beemster GTS, Ljung K, De Smet I, Van Isterdael G, Naudts M, Iida R, Gruissem W, Tasaka M *et al*: **Cell Cycle Progression in the Pericycle Is Not Sufficient for SOLITARY ROOT/ IAA14-Mediated Lateral Root Initiation in Arabidopsis thaliana.** *The Plant Cell Online* 2005, **17**(11):3035-3050.
155. Jin H, Cominelli E, Bailey P, Parr A, Mehrtens F, Jones J, Tonelli C, Weisshaar B, Martin C: **Transcriptional repression by AtMYB4 controls production of UV - protecting sunscreens in Arabidopsis.** *The EMBO Journal* 2000, **19**(22):6150-6161.
156. Hua J, Sakai H, Nourizadeh S, Chen QG, Bleecker AB, Ecker JR, Meyerowitz EM: **EIN4 and ERS2 Are Members of the Putative Ethylene Receptor Gene Family in Arabidopsis.** *The Plant Cell Online* 1998, **10**(8):1321-1332.
157. Tieman DM, Taylor MG, Ciardi JA, Klee HJ: **The tomato ethylene receptors NR and LeETR4 are negative regulators of ethylene response and exhibit functional compensation within a multigene family.** *Proceedings of the National Academy of Sciences* 2000, **97**(10):5663-5668.
158. Woeste KE, Kieber JJ: **A Strong Loss-of-Function Mutation in RAN1 Results in Constitutive Activation of the Ethylene Response Pathway as Well as a Rosette-Lethal Phenotype.** *The Plant Cell Online* 2000, **12**(3):443-455.
